# Supplementary material for: BODIPY–GO nanocomposites decorated with a biocompatible branched ethylene glycol moiety for targeted PDT
Source: Royal Society of Chemistry journal article supplement (doi:10.1039/d2dt04013a), 2023-01-01
Supplement: d2dt04013a1.pdf [file d2dt04013a1.pdf]

**BODIPY-GO Nanocomposites Decorated with Biocompatible Branched Ethylene glycol  
Moiety for Targeted PDT**

Ezel ÖZTÜRK GÜNDÜZ<sup>a</sup>, Rovshen ATAJanOV<sup>a</sup>, M. Emre GEDIK<sup>b</sup>, Esra TANRIVERDİ  
EÇİK<sup>c</sup>, Gurcan GUNAYDIN<sup>b</sup>, Elif OKUTAN<sup>a\*</sup>

<sup>a</sup> Department of Chemistry, Faculty of Science, Gebze Technical University, Gebze, Kocaeli,  
Türkiye

<sup>b</sup> Department of Basic Oncology, Cancer Institute, Hacettepe University, Çankaya, Ankara 06100  
Turkey

<sup>c</sup> Department of Chemistry, Faculty of Science, Atatürk University, Yakutiye, Erzurum, Türkiye

\* Author for correspondence:

Dr. Elif OKUTAN, Department of Chemistry, Gebze Technical University, P.O.Box: 141, Gebze  
41400, Kocaeli, Turkey

Tel: 00 90 262 6053091

Fax: 00 90 262 6053105

e-mail: eokutan@gtu.edu.tr



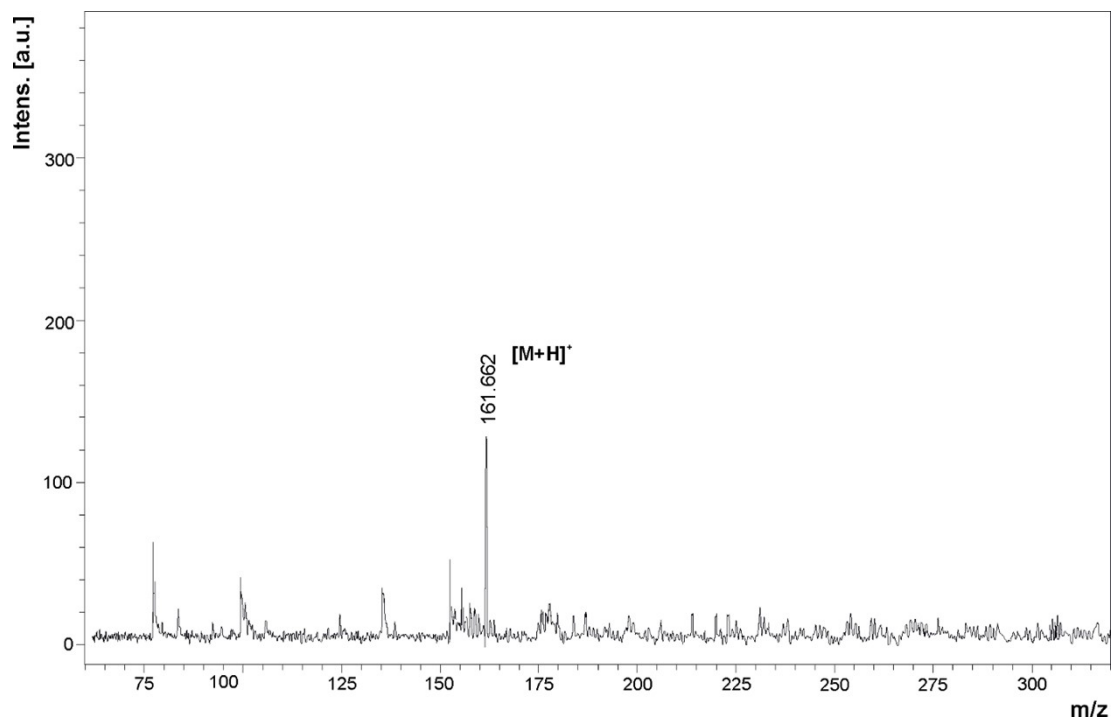

Fig. S1 MALDI-MS spectrum of compound 1

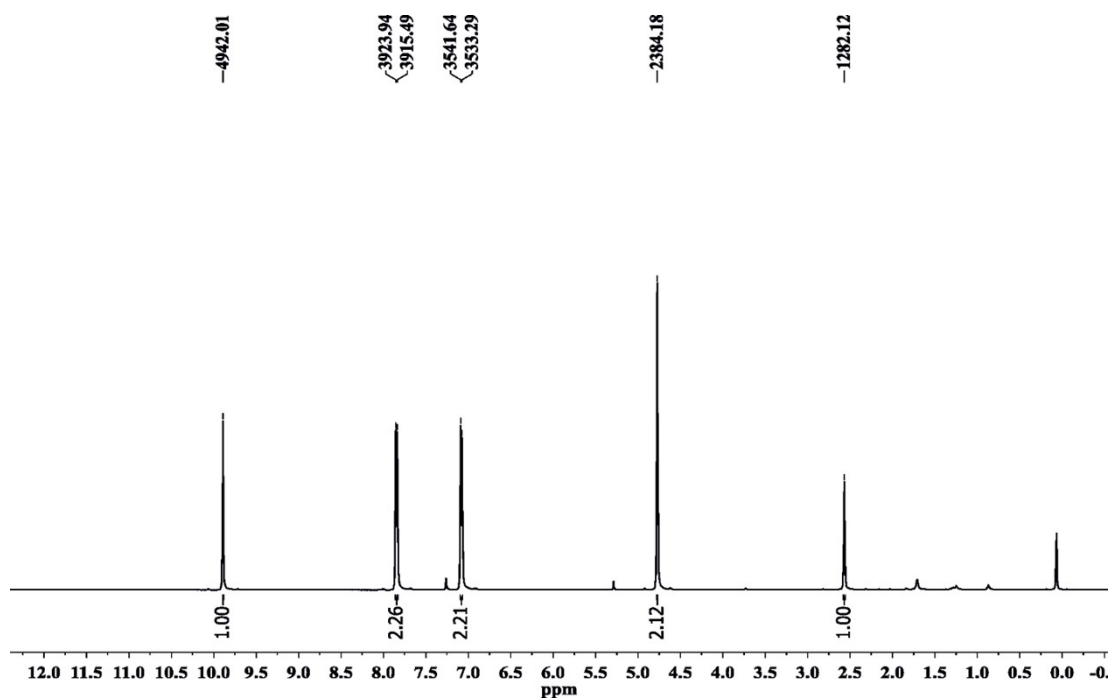

Fig. S2  $^1\text{H}$  NMR spectrum of compound 1 in  $\text{CDCl}_3$

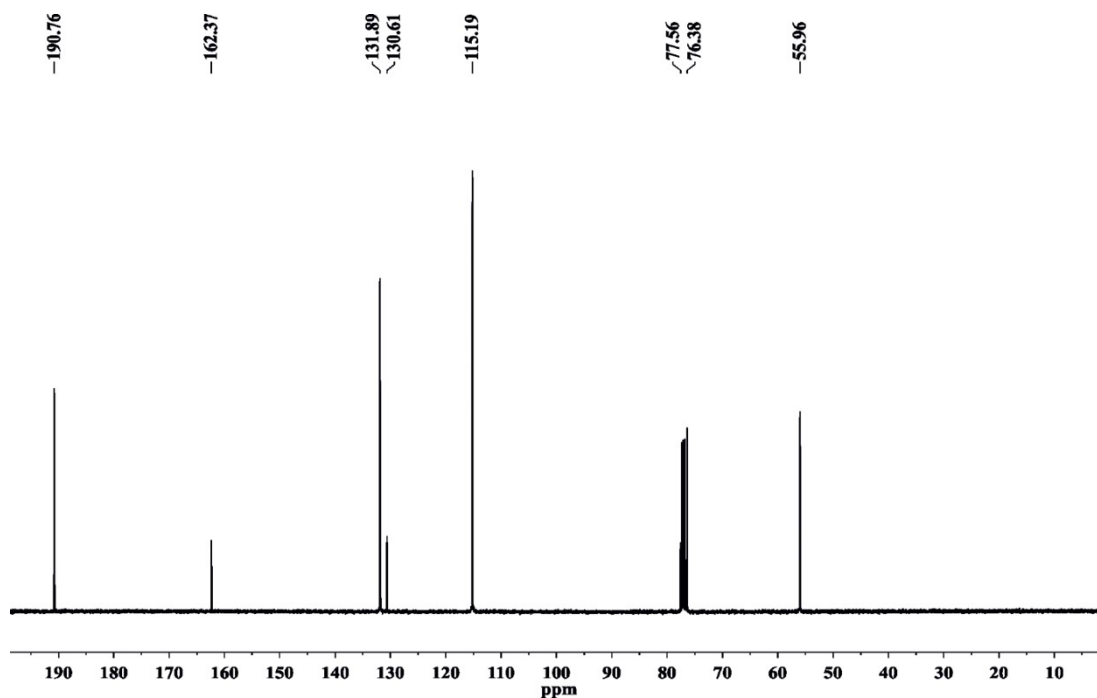

Fig. S3  $^{13}\text{C}$  NMR spectrum of compound **1** in  $\text{CDCl}_3$

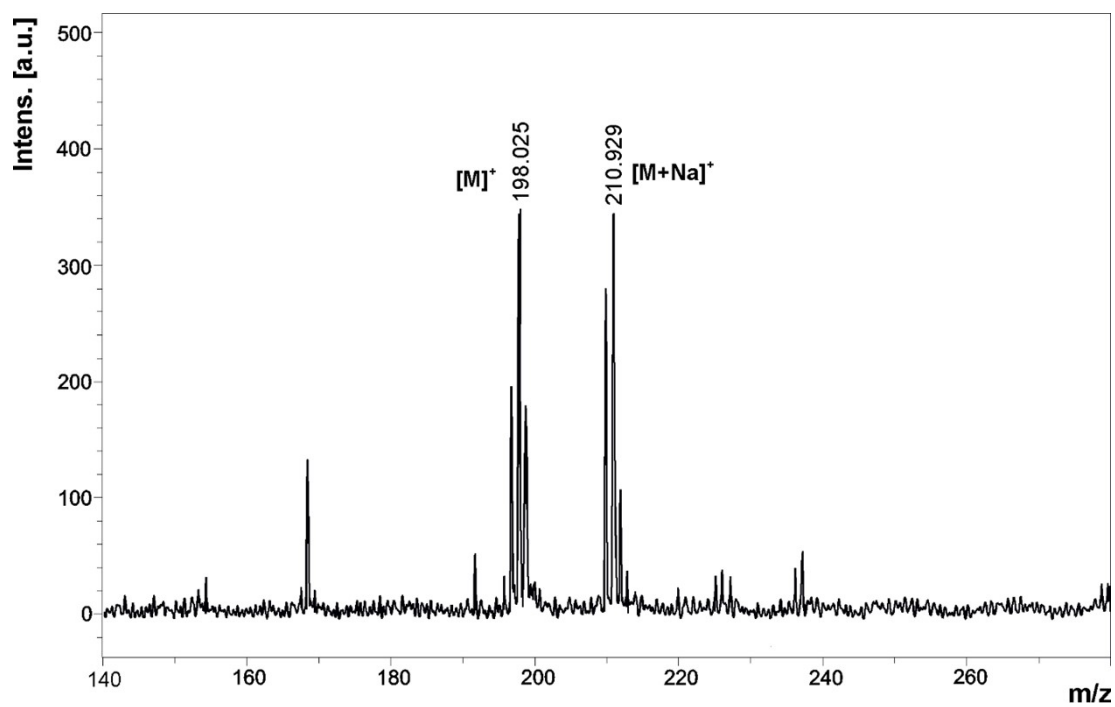

Fig. S4 MALDI-MS spectrum of compound **2**

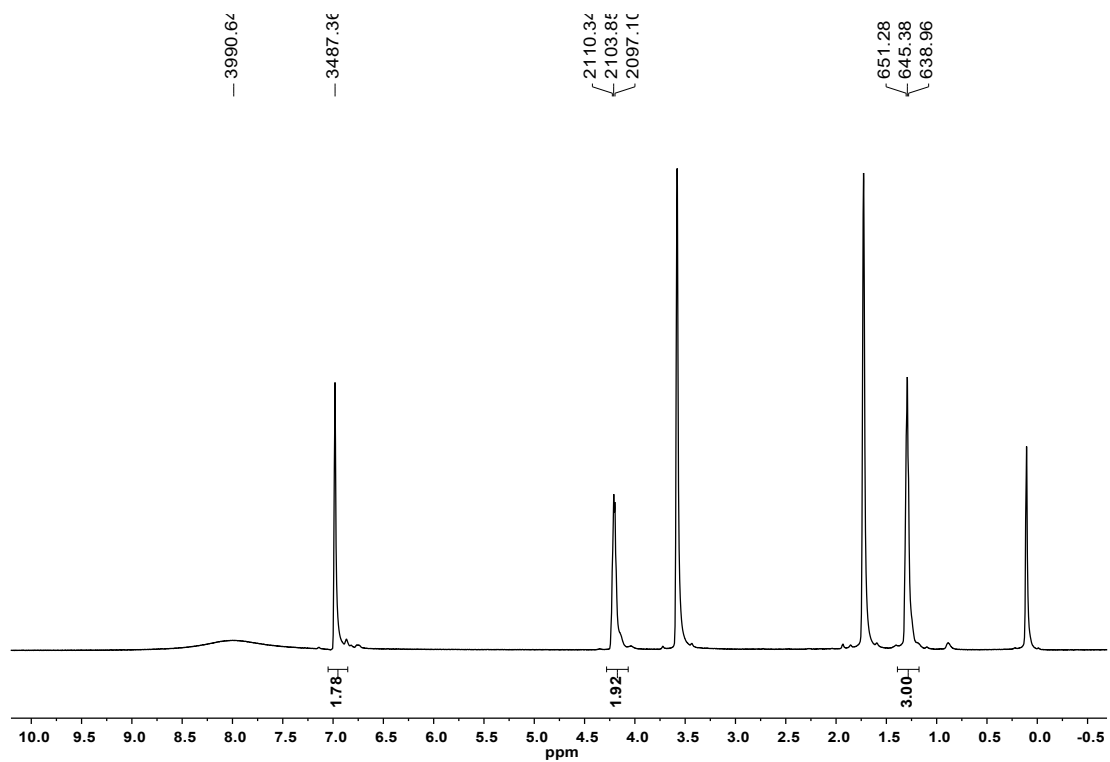

Fig. S5 <sup>1</sup>H NMR spectrum of compound 2 in CDCl<sub>3</sub>

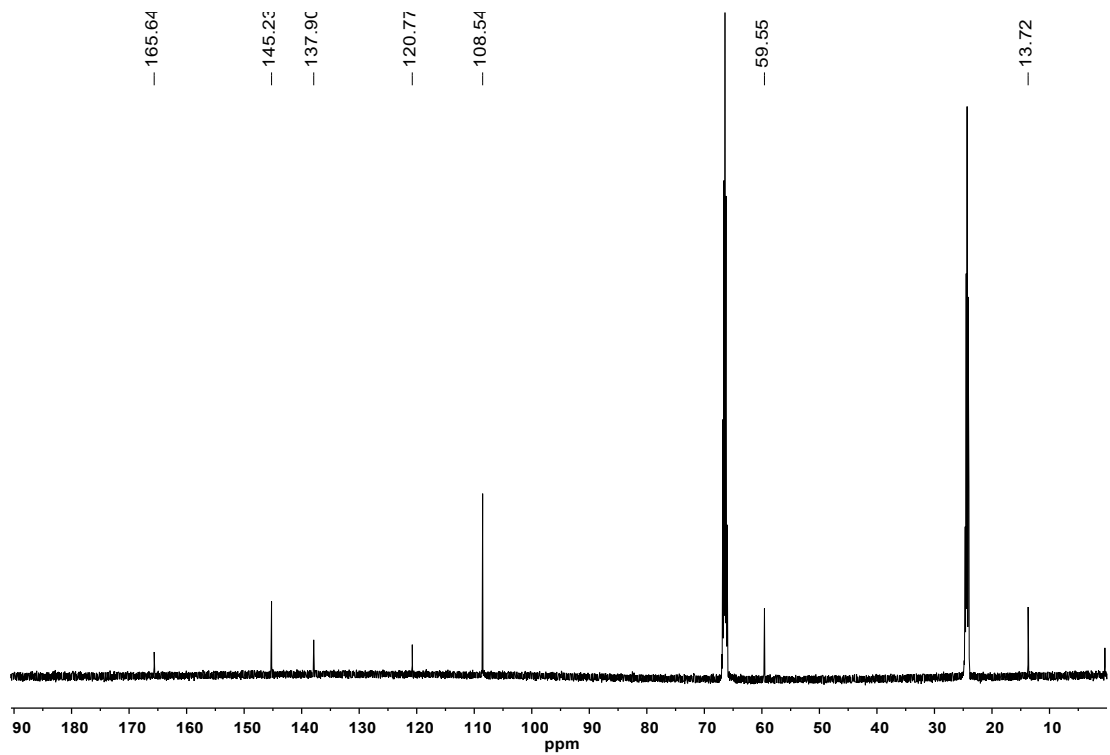

Fig. S6 <sup>13</sup>C NMR spectrum of compound 2 in CDCl<sub>3</sub>

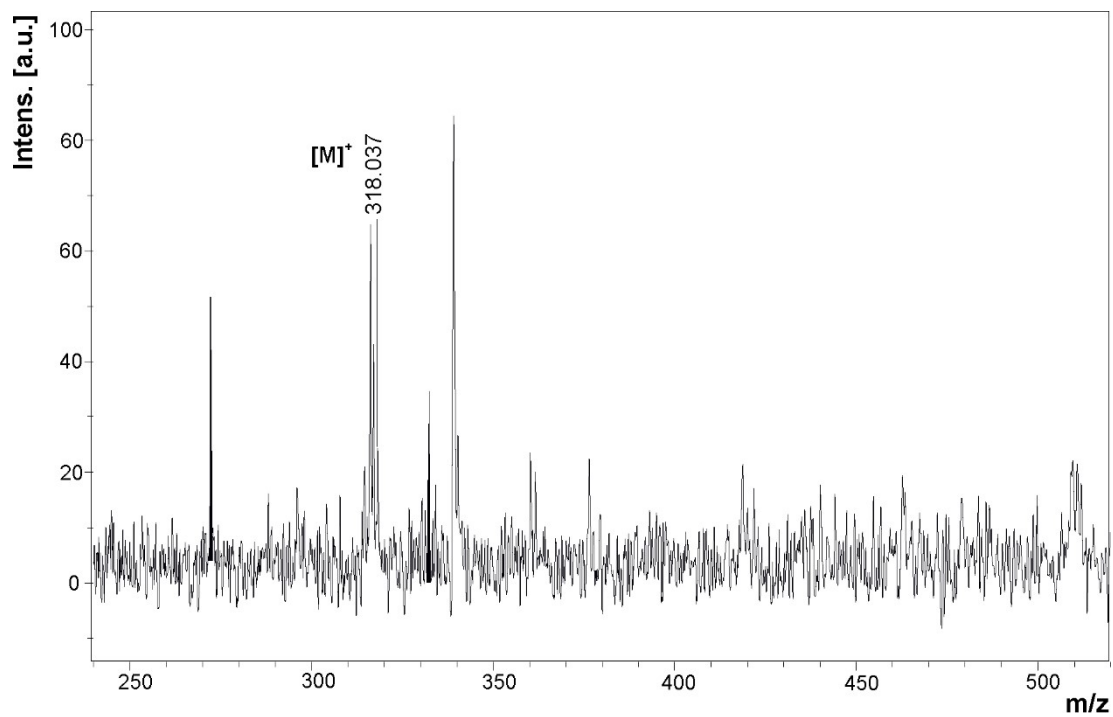

Fig. S7 MALDI-MS spectrum of compound 3

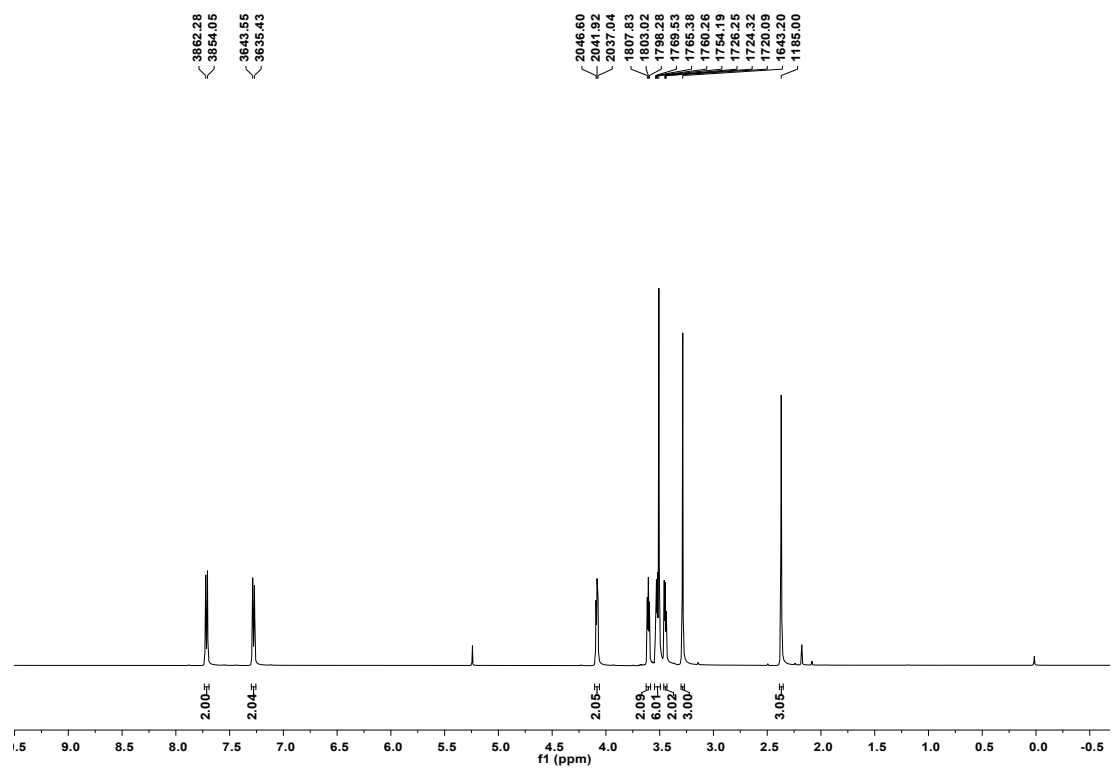

Fig. S8 <sup>1</sup>H NMR spectrum of compound 3 in CDCl<sub>3</sub>

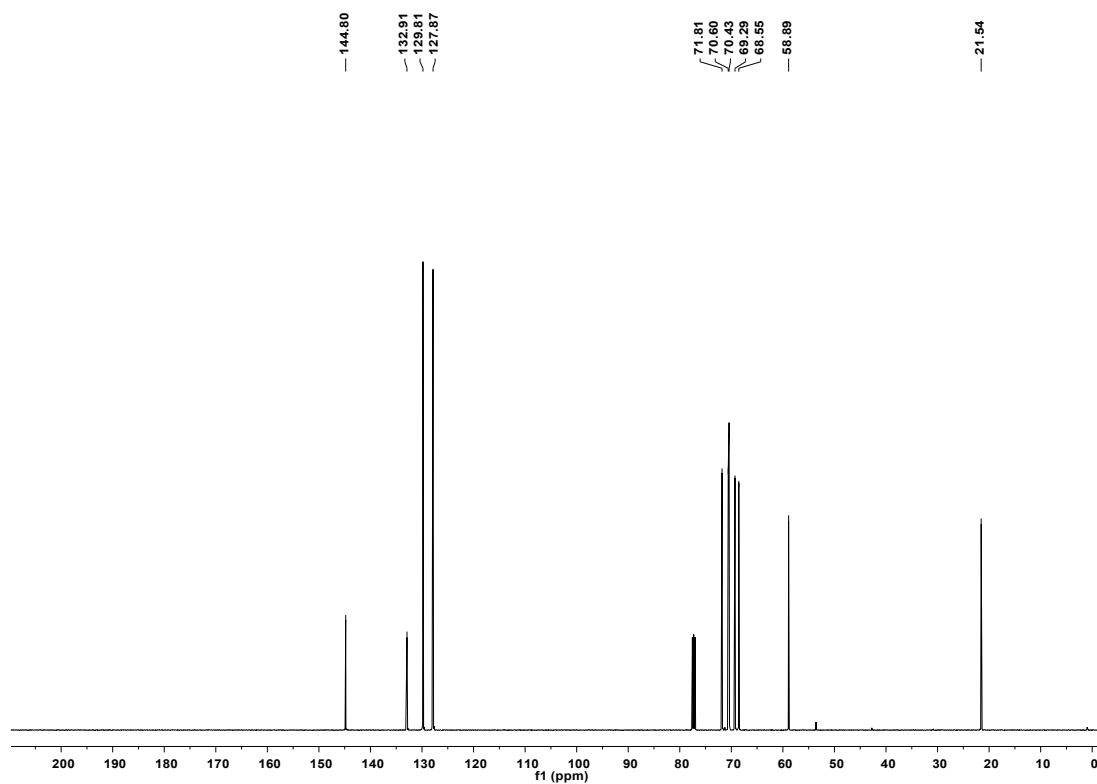

Fig. S9  $^{13}\text{C}$  NMR spectrum of compound **3** in  $\text{CDCl}_3$

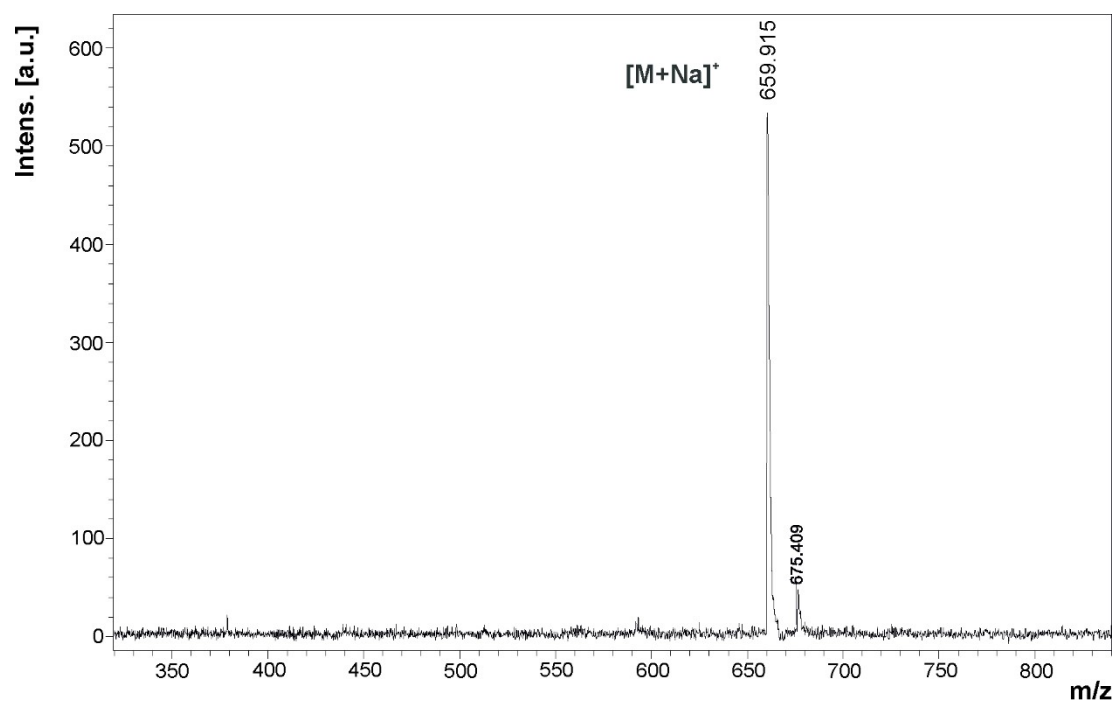

Fig. S10 MALDI-MS spectrum of compound **4**

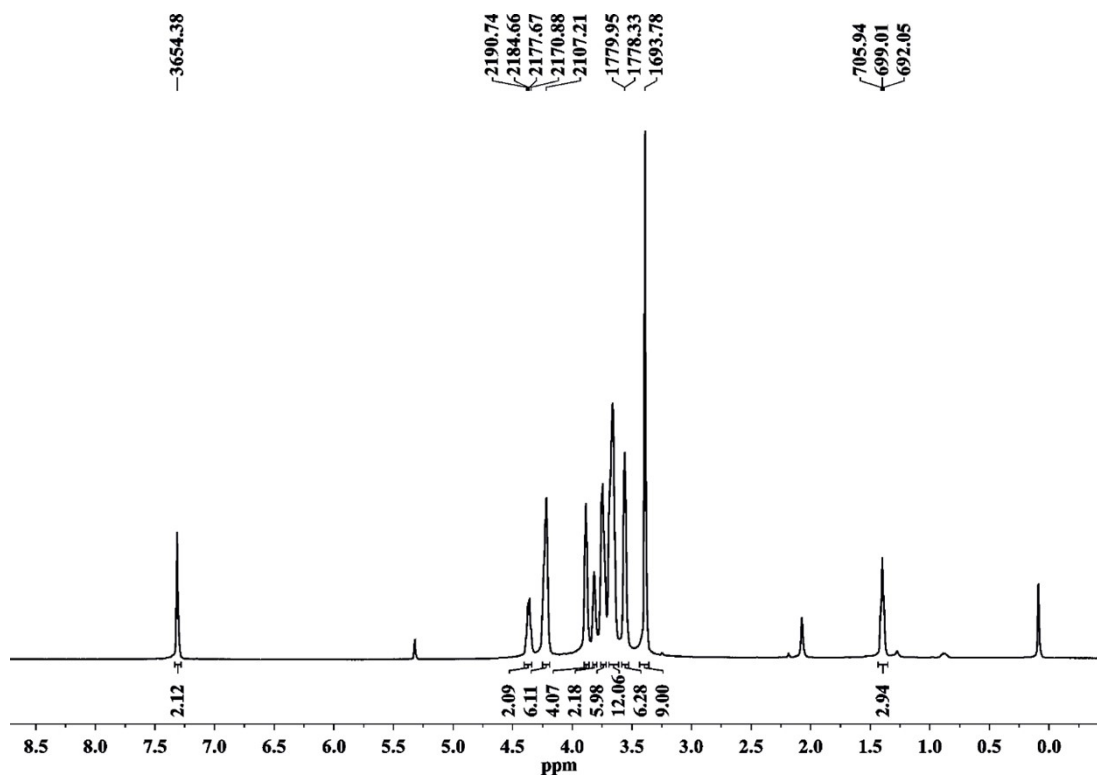

Fig. S11  $^1\text{H}$  NMR spectrum of compound 4 in  $\text{CDCl}_3$

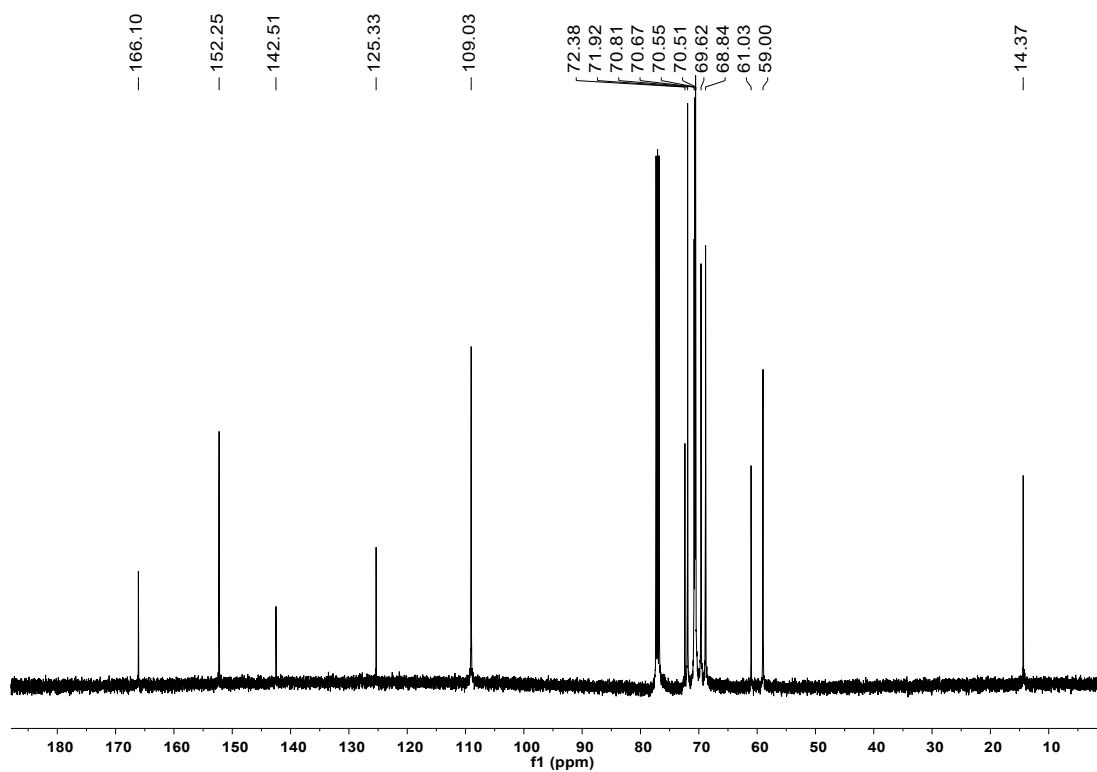

Fig. S12  $^{13}\text{C}$  NMR spectrum of compound 4 in  $\text{CDCl}_3$



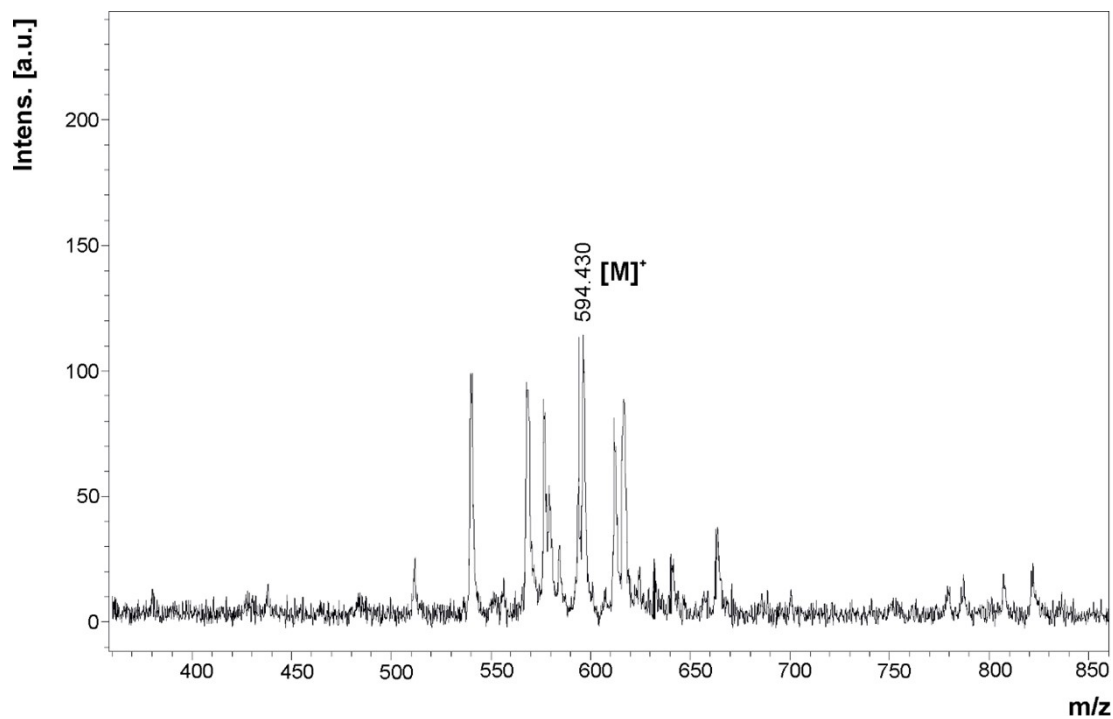

Fig. S13 MALDI-MS spectrum of compound 5

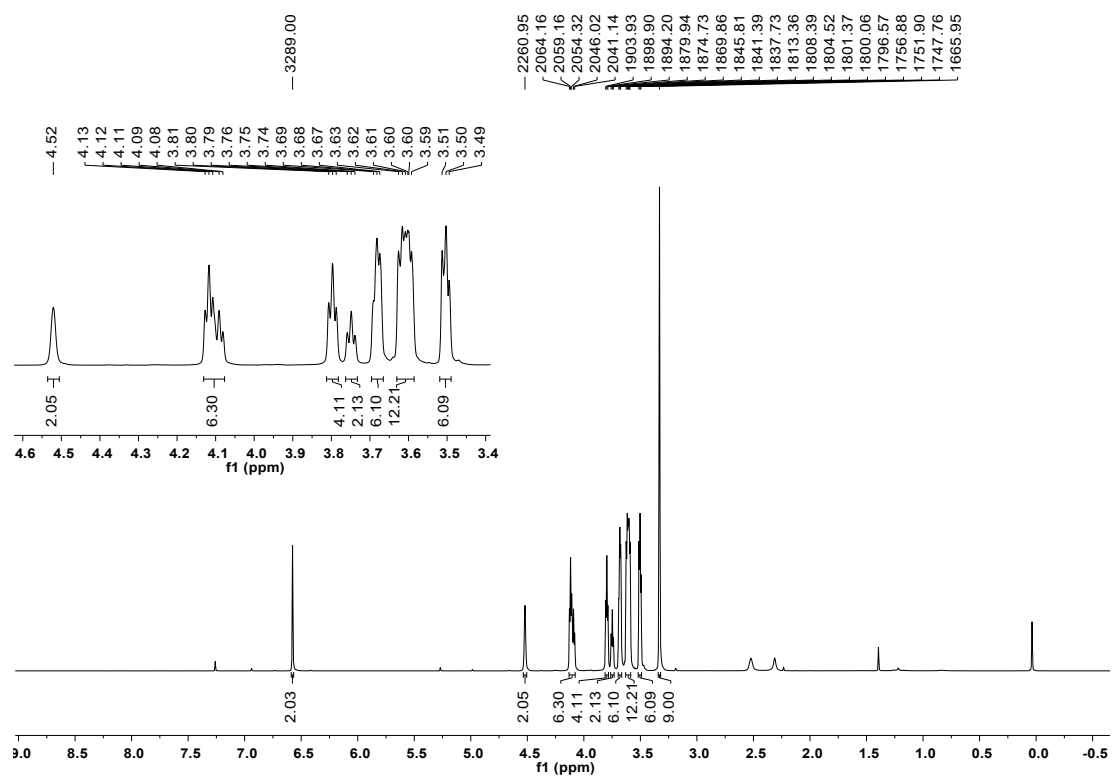

Fig. S14 <sup>1</sup>H NMR spectrum of compound 5 in CDCl<sub>3</sub>

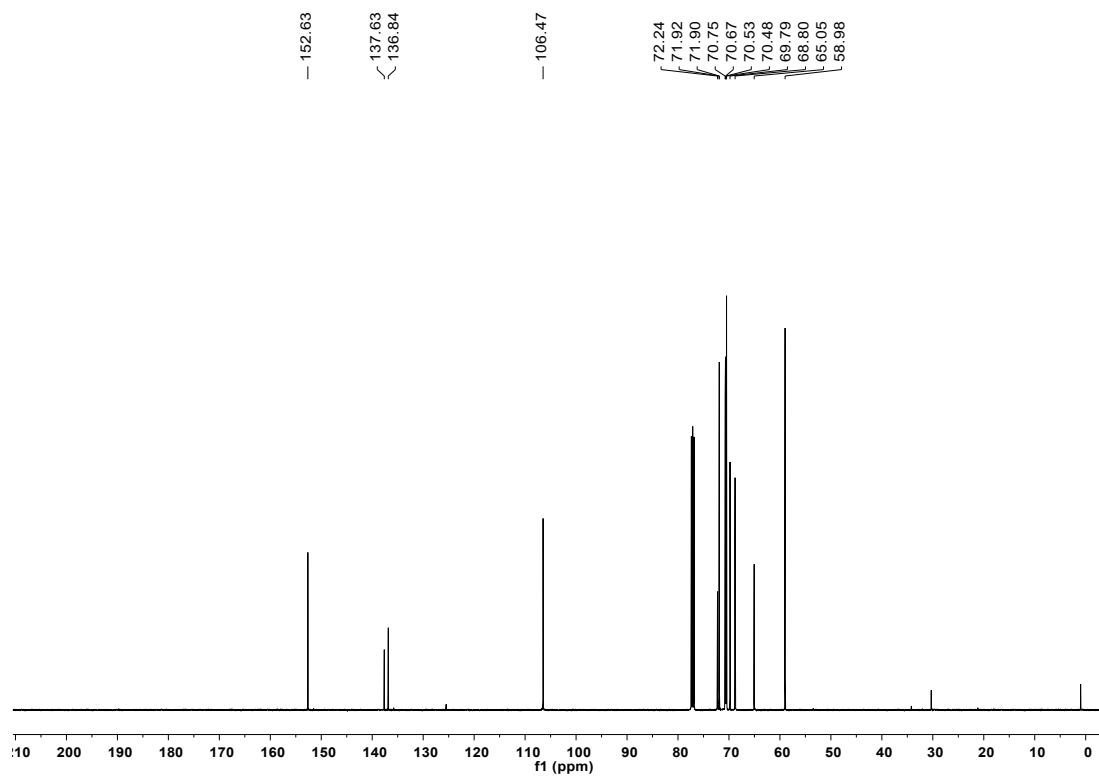

**Fig. S15**  $^{13}\text{C}$  NMR spectrum of compound **5** in  $\text{CDCl}_3$

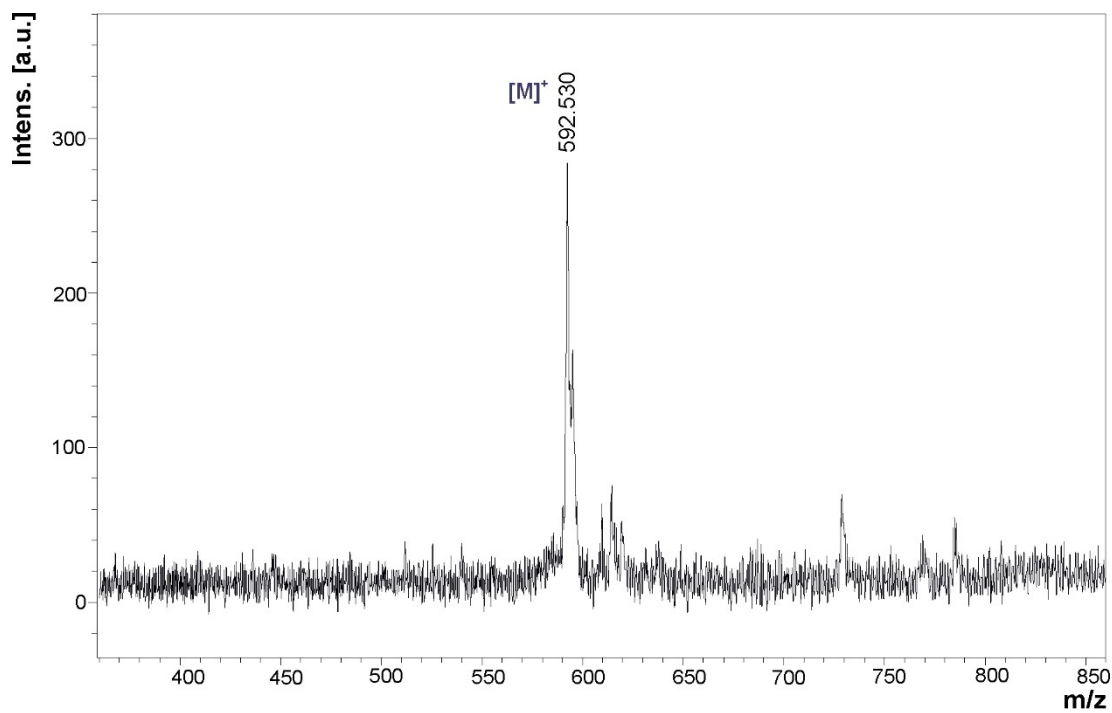

**Fig. S16** MALDI-MS spectrum of compound **6**

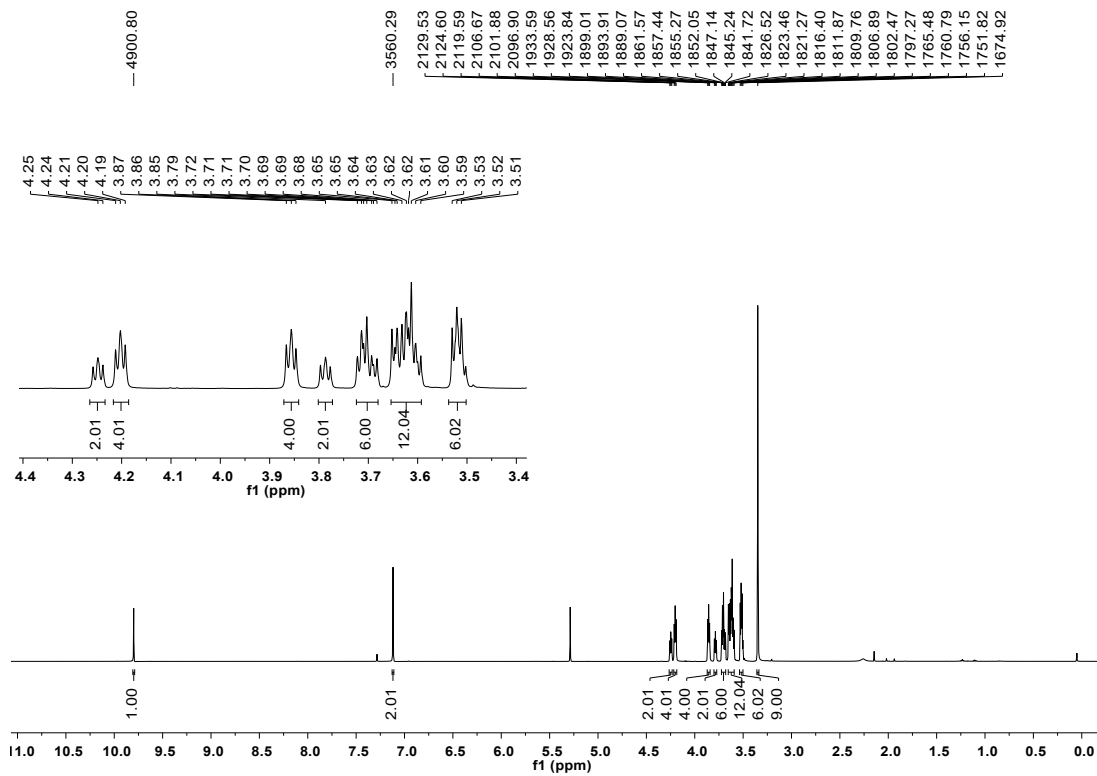

Fig. S17  $^1\text{H}$  NMR spectrum of compound **6** in  $\text{CDCl}_3$

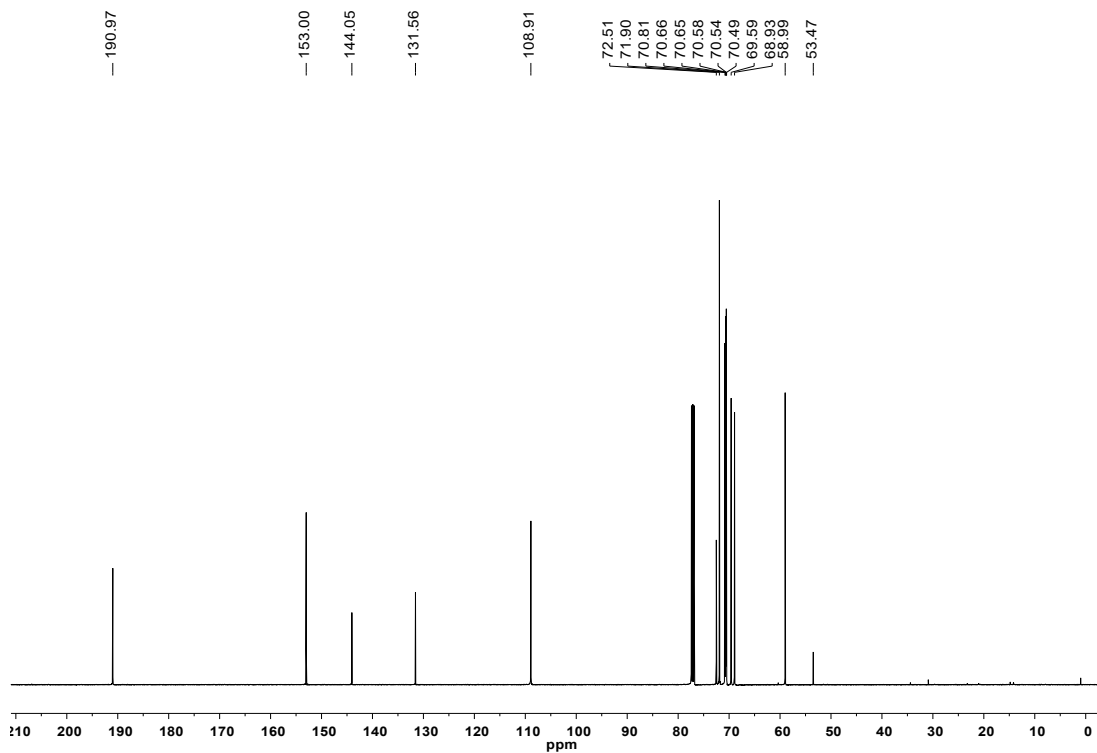

Fig. S18  $^{13}\text{C}$  NMR spectrum of compound **6** in  $\text{CDCl}_3$



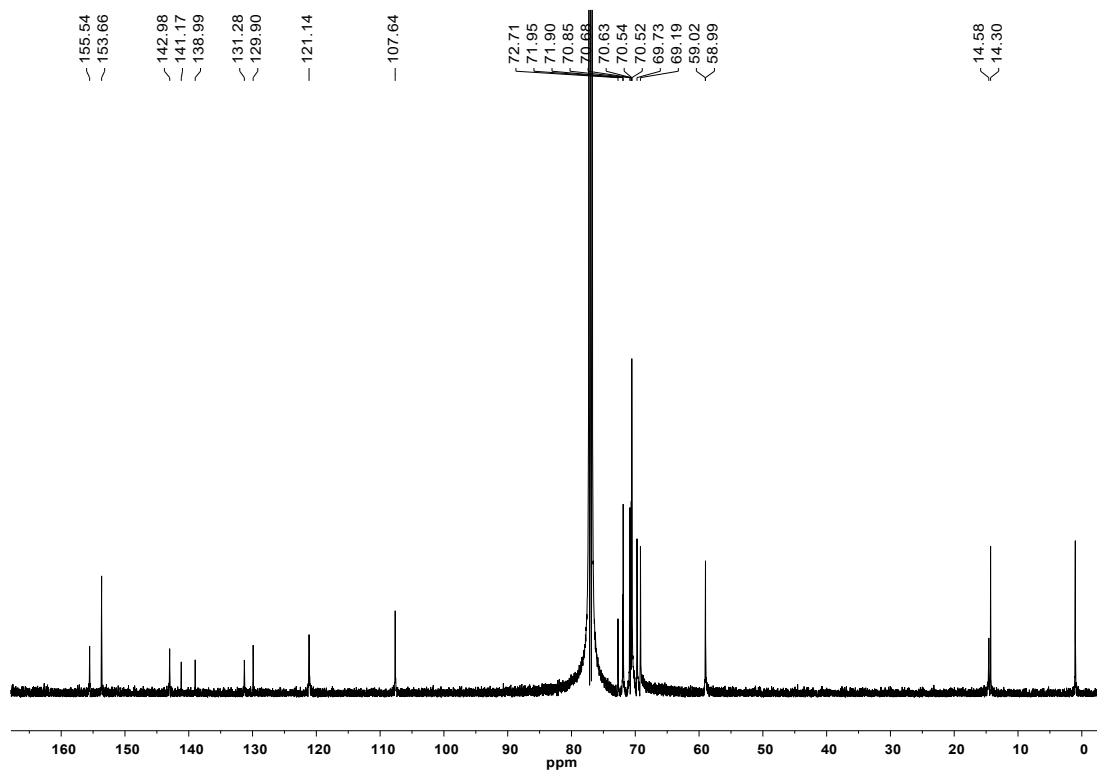

Fig. S21  $^{13}\text{C}$  NMR spectrum of compound **7** in  $\text{CDCl}_3$

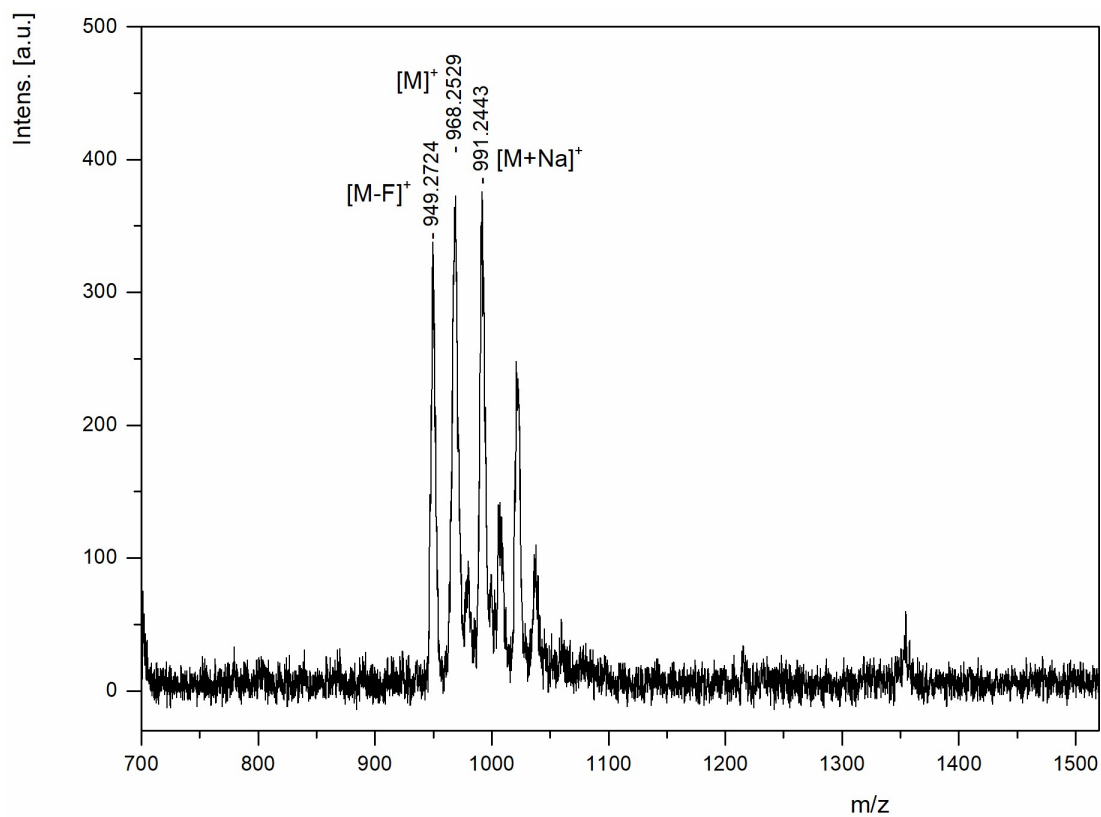

Fig. S22 MALDI-MS spectrum of compound **8**

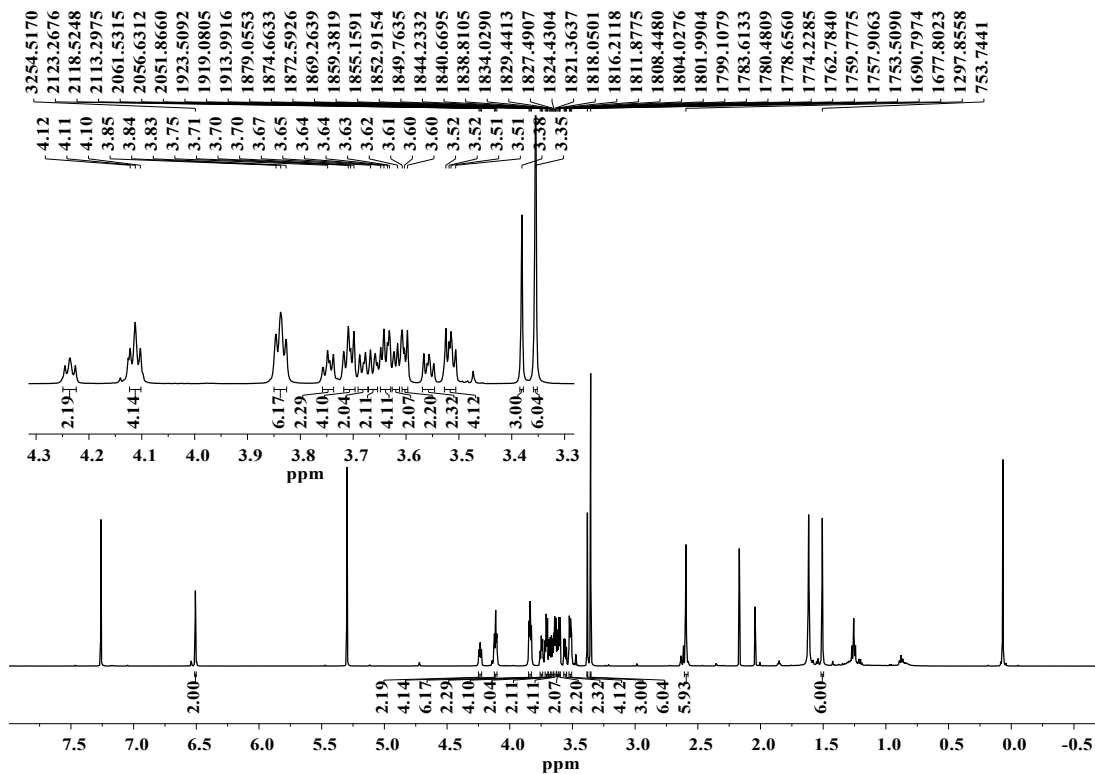

Fig. S23  $^1\text{H}$  NMR spectrum of compound **8** in  $\text{CDCl}_3$

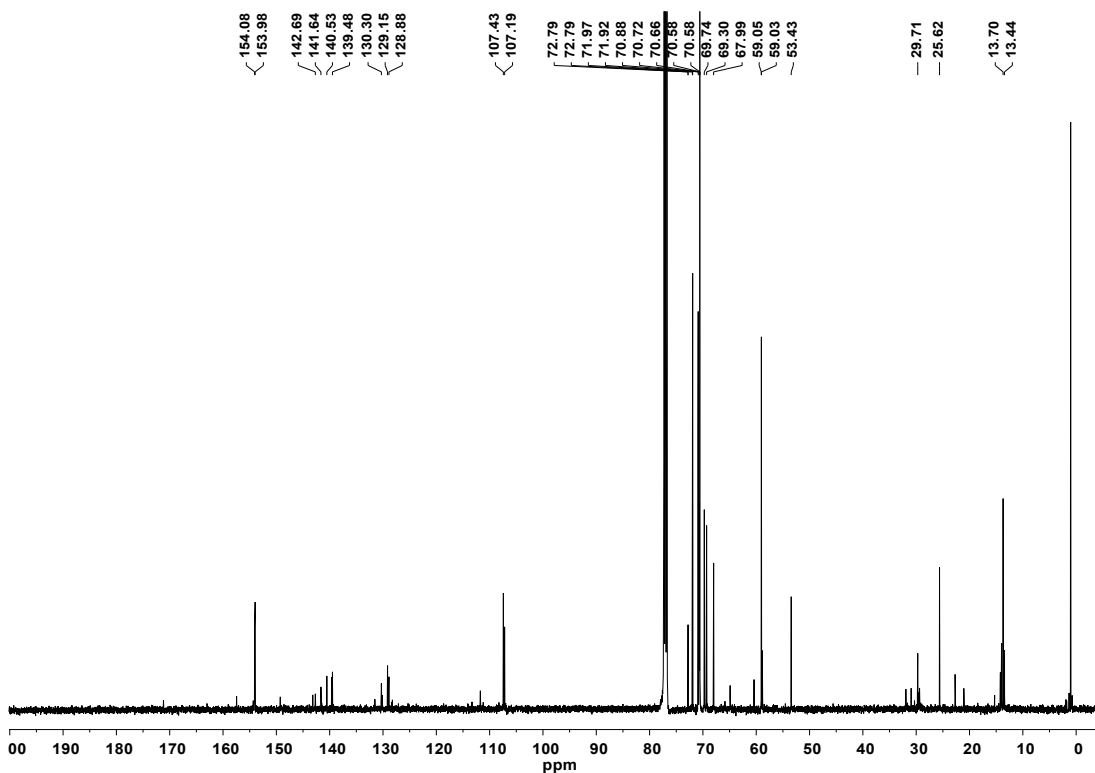

Fig. S24  $^{13}\text{C}$  NMR spectrum of compound **8** in  $\text{CDCl}_3$

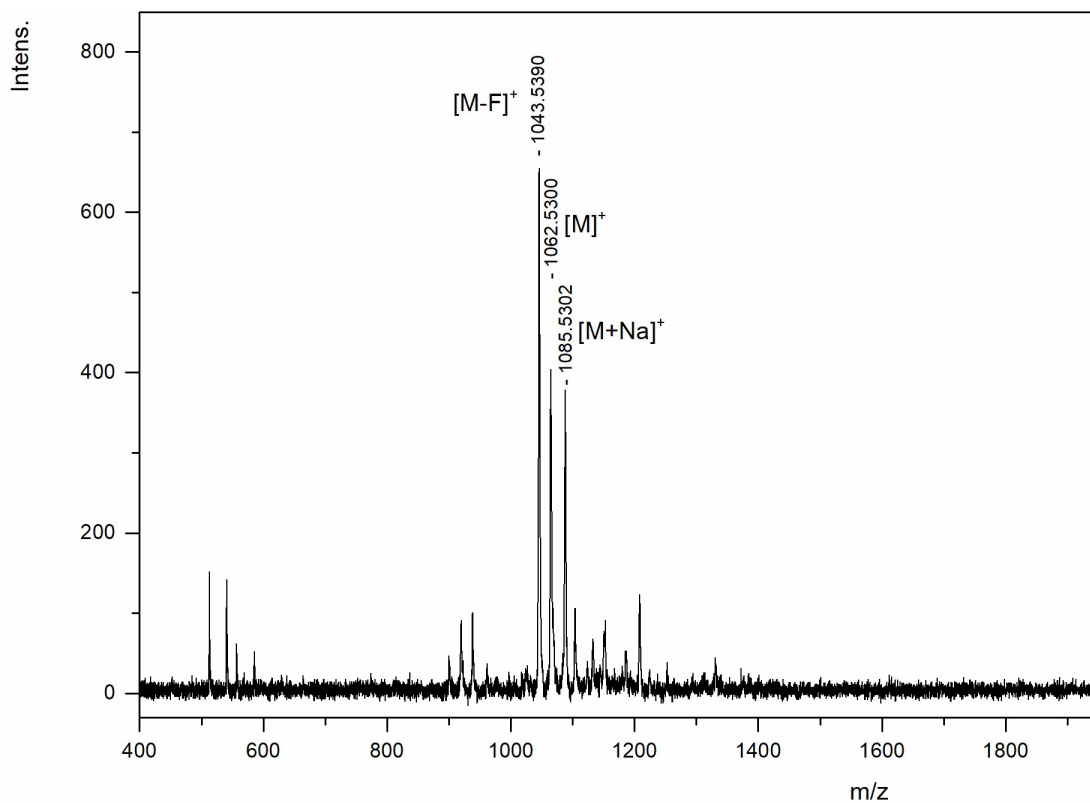

**Fig. S25** MALDI-MS spectrum of compound **9**

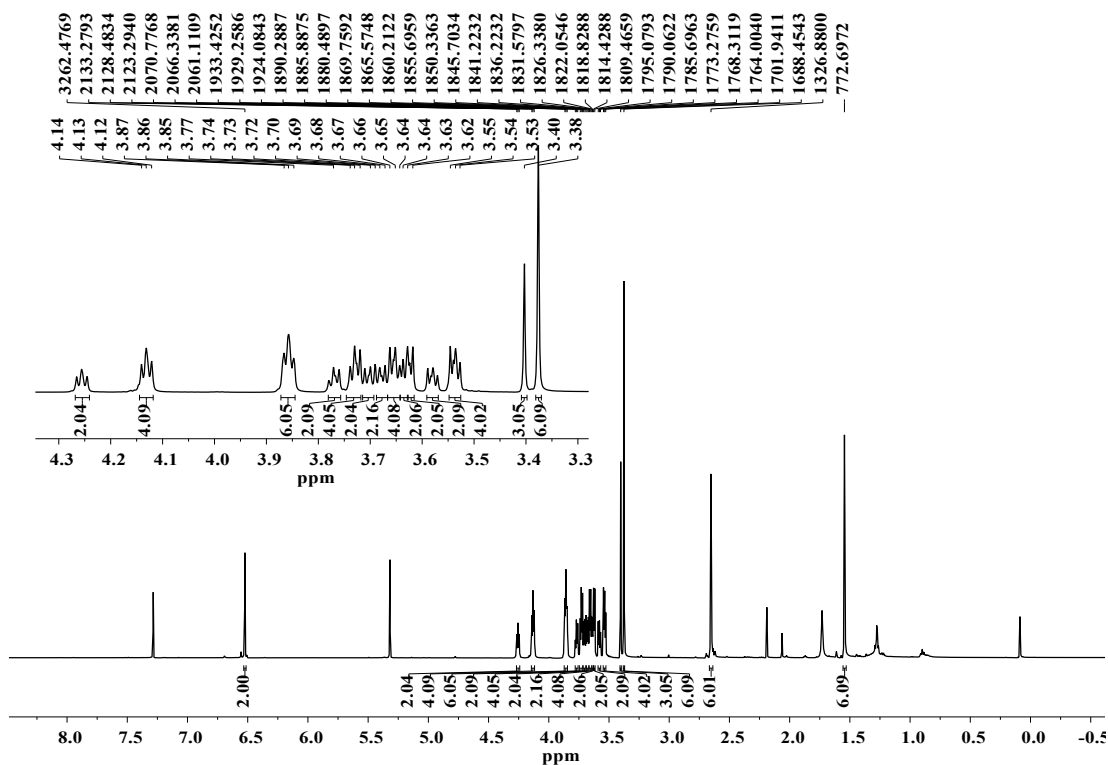

**Fig. S26**  $^1\text{H}$  NMR spectrum of compound **9** in  $\text{CDCl}_3$

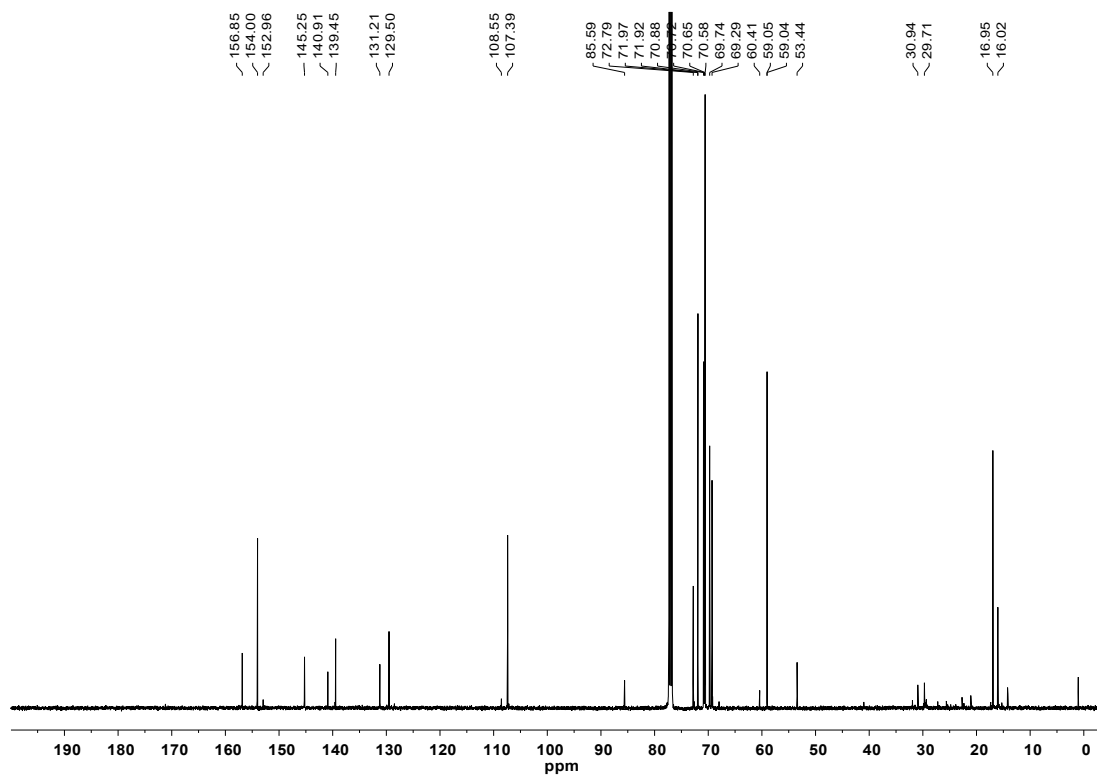

Fig. S27  $^{13}\text{C}$  NMR spectrum of compound **9** in  $\text{CDCl}_3$

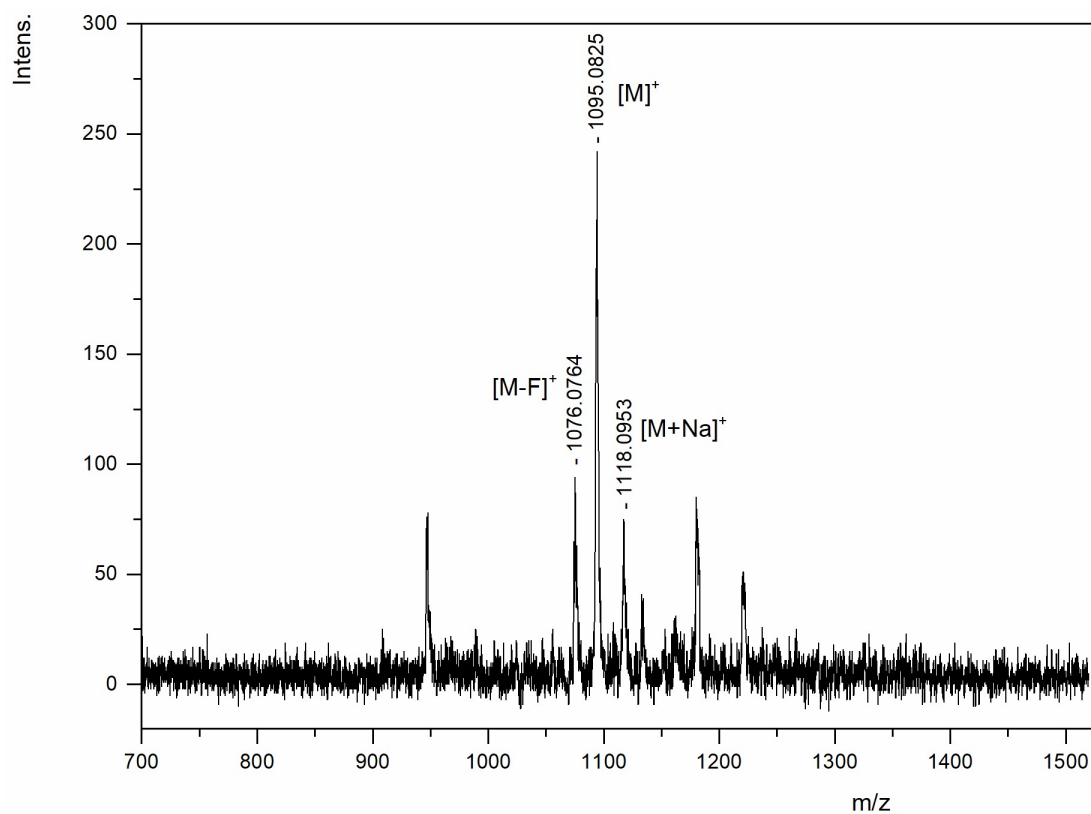

Fig. S28 MALDI-MS spectrum of compound **10**



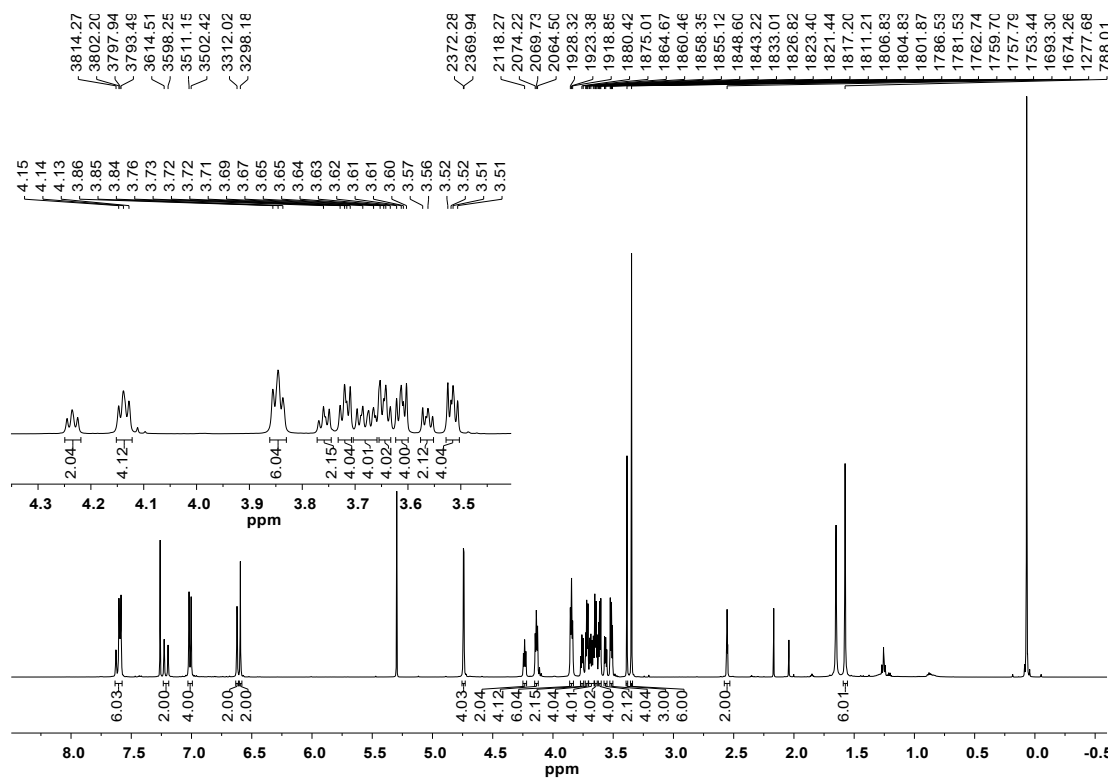

Fig. S29  $^1\text{H}$  NMR spectrum of compound **10** in  $\text{CDCl}_3$

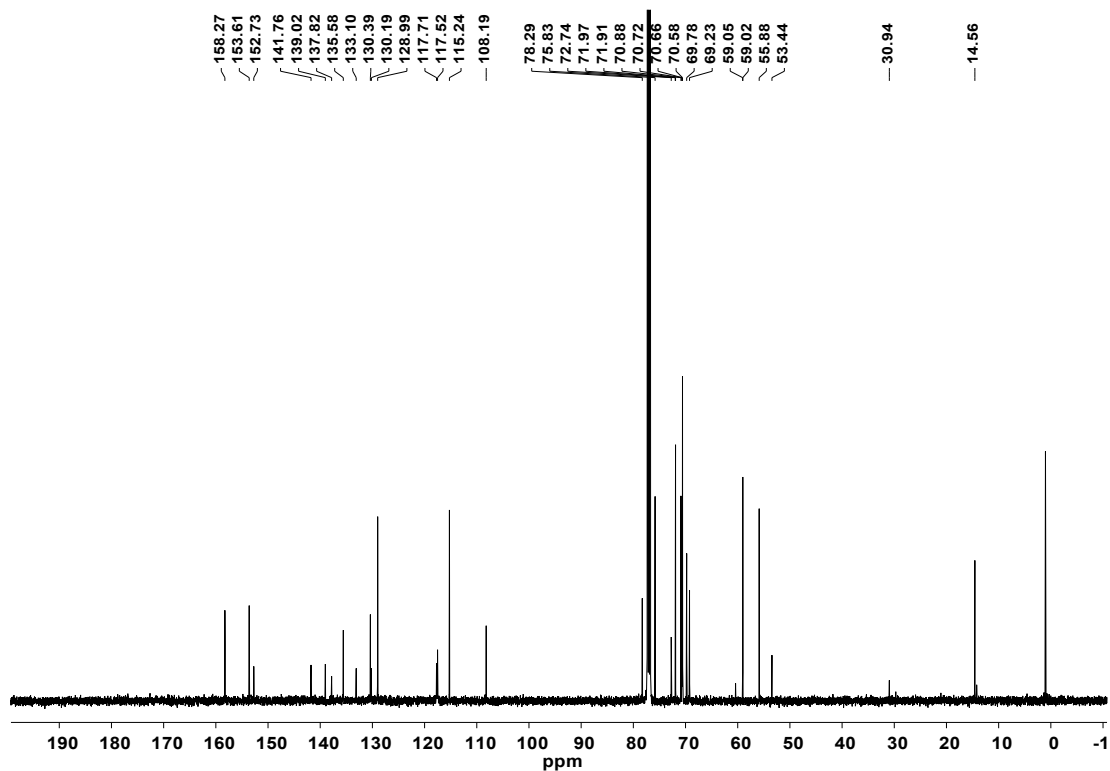

Fig. S30  $^{13}\text{C}$  NMR spectrum of compound **10** in  $\text{CDCl}_3$

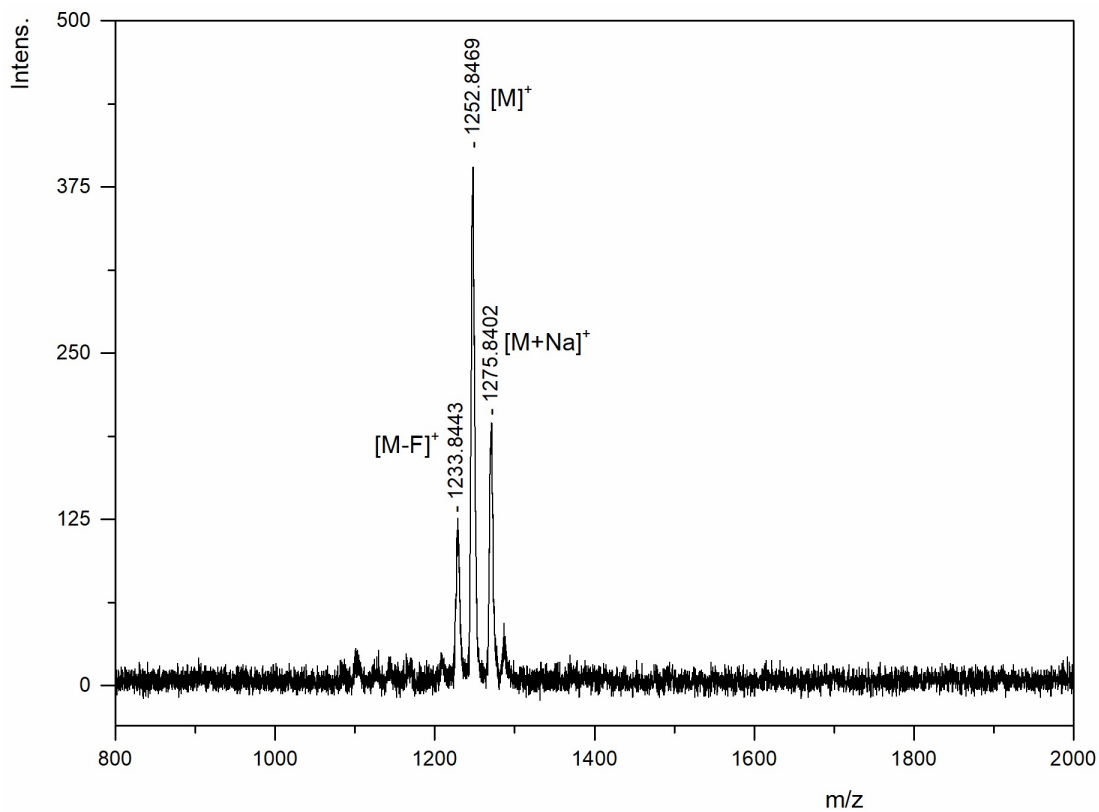

Fig. S31 MALDI-MS spectrum of compound 11

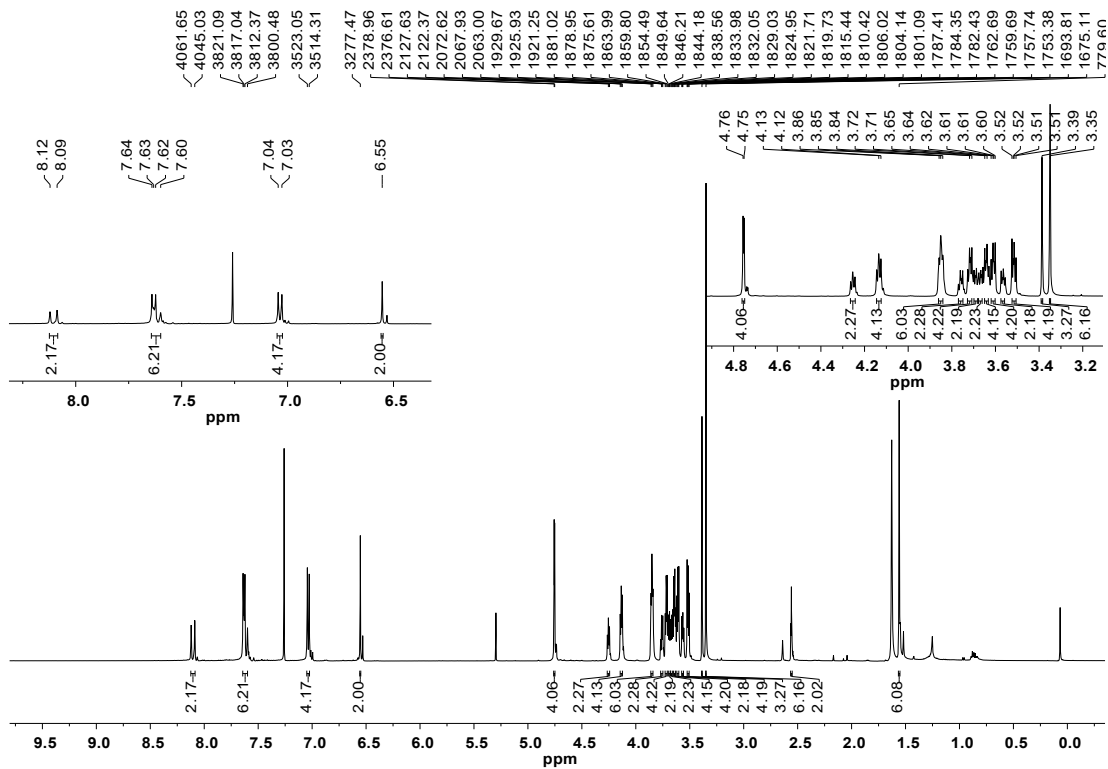

Fig. S32  $^1H$  NMR spectrum of compound 11 in  $CDCl_3$

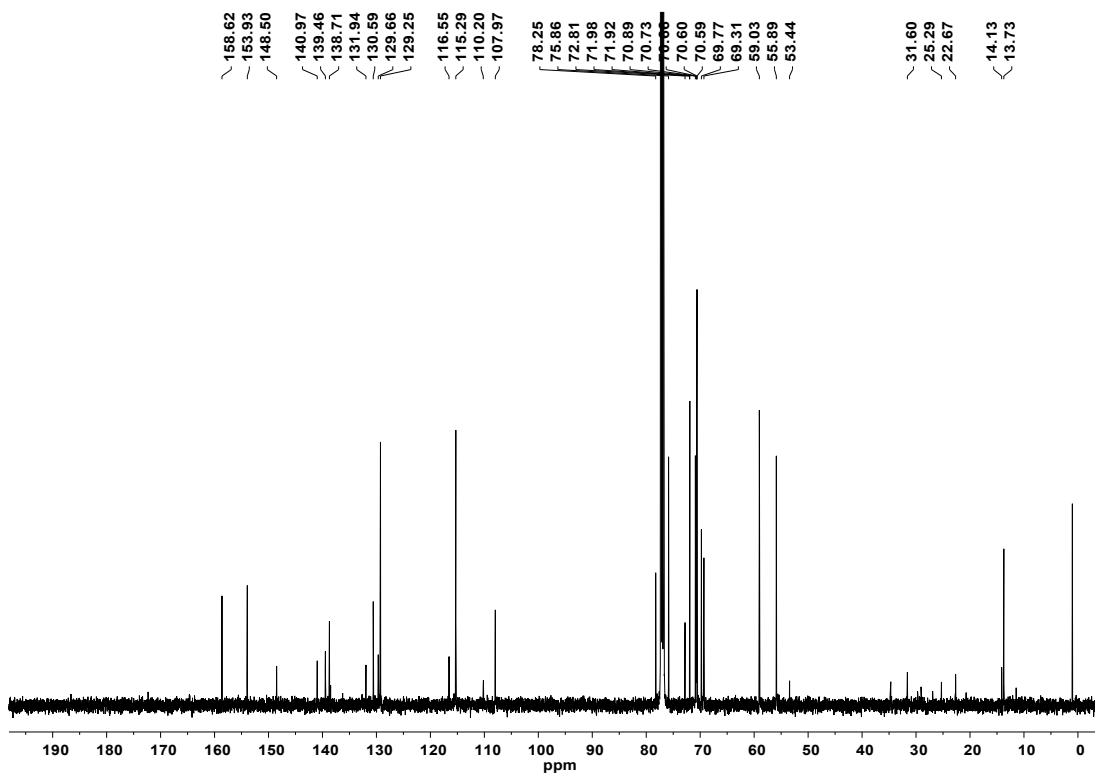

Fig. S33  $^{13}\text{C}$  NMR spectrum of compound **11** in  $\text{CDCl}_3$

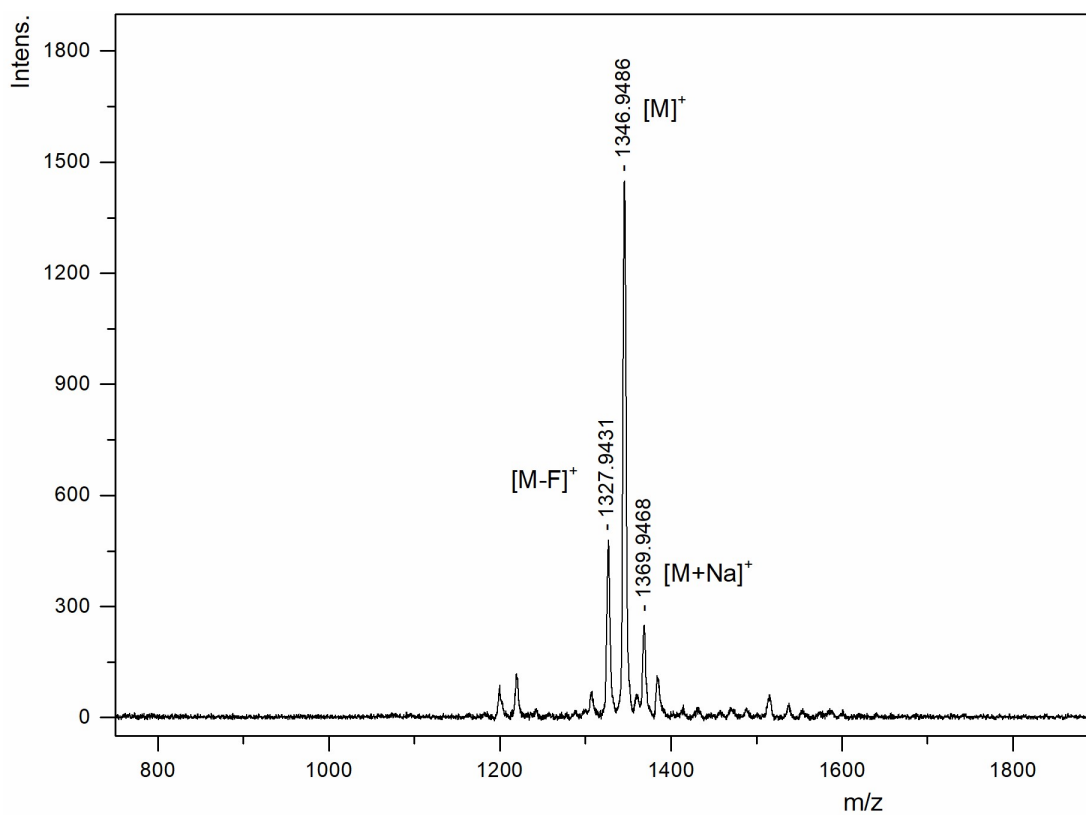

Fig. S34 MALDI-MS spectrum of compound **12**

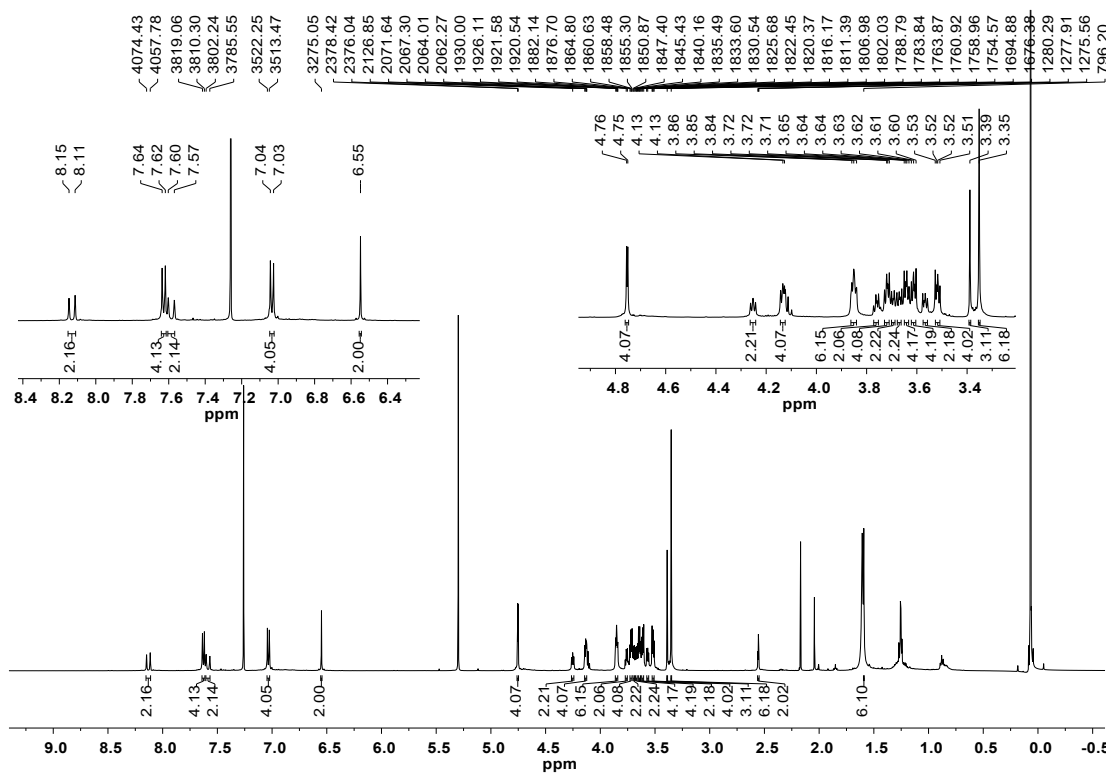

**Fig. S35**  $^1\text{H}$  NMR spectrum of compound **12** in  $\text{CDCl}_3$

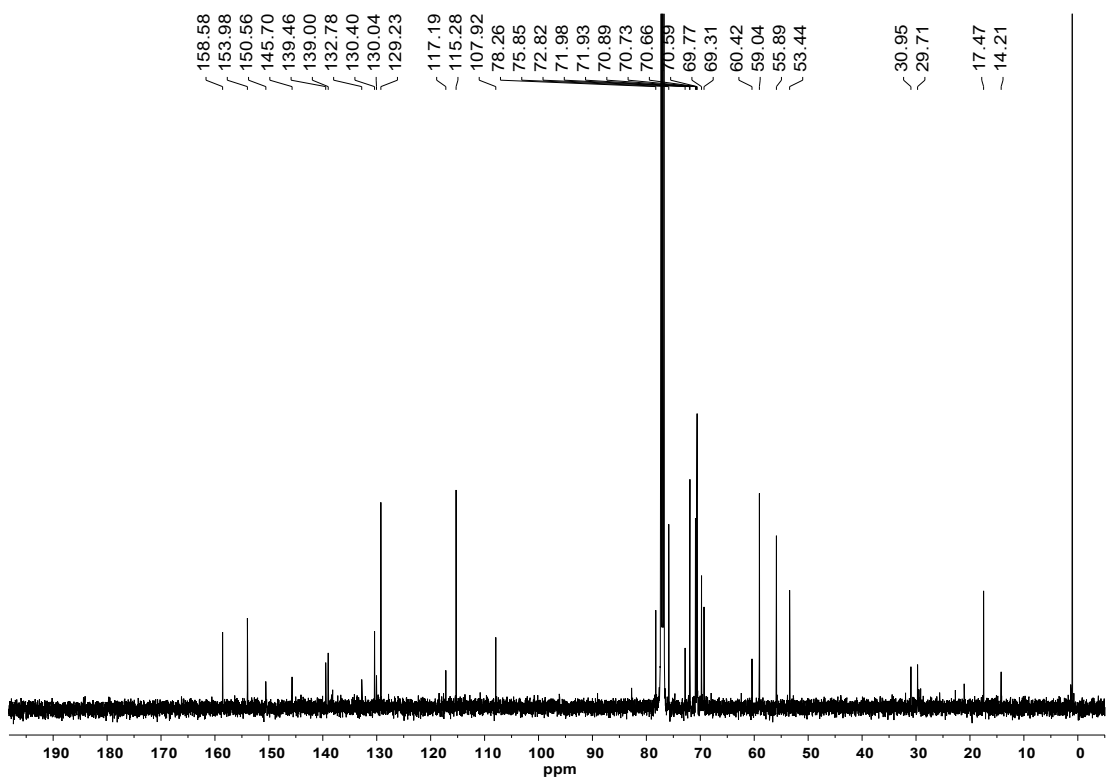

**Fig. S36**  $^{13}\text{C}$  NMR spectrum of compound **12** in  $\text{CDCl}_3$

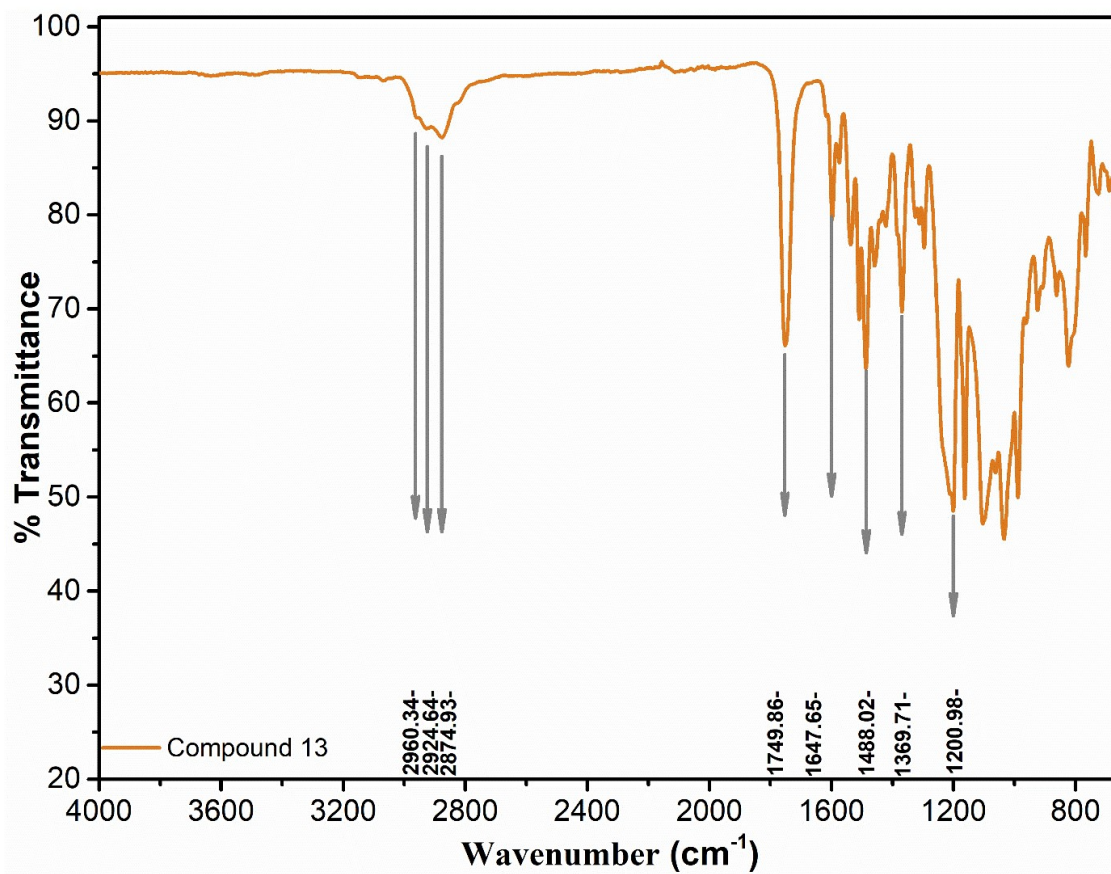

**Fig. S37** FT-IR spectrum of compound **13**

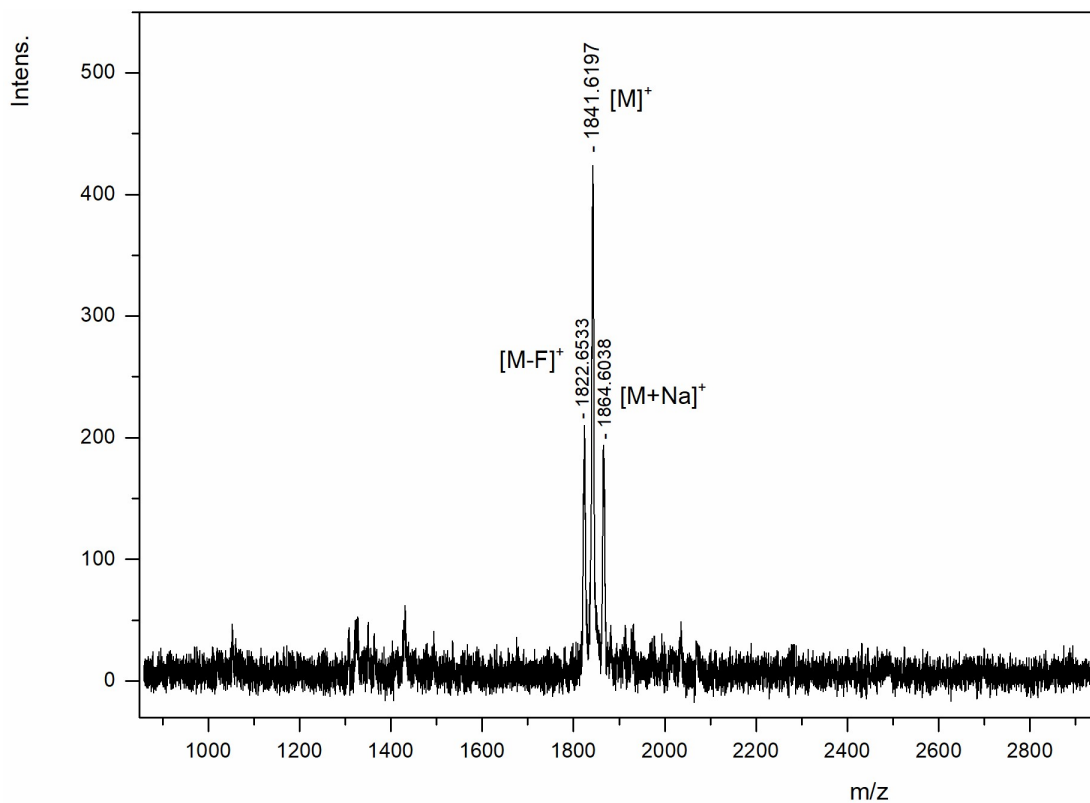

Fig. S38 MALDI-MS spectrum of compound 13

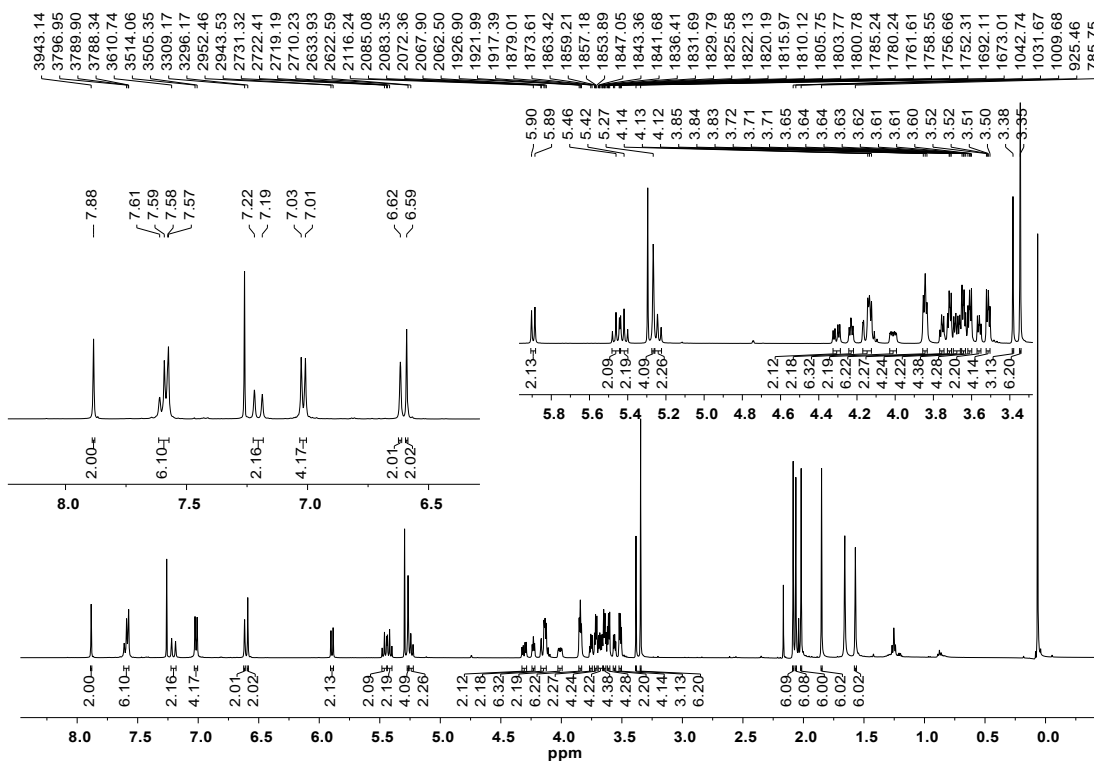

Fig. S39 <sup>1</sup>H NMR spectrum of compound 13 in CDCl<sub>3</sub>

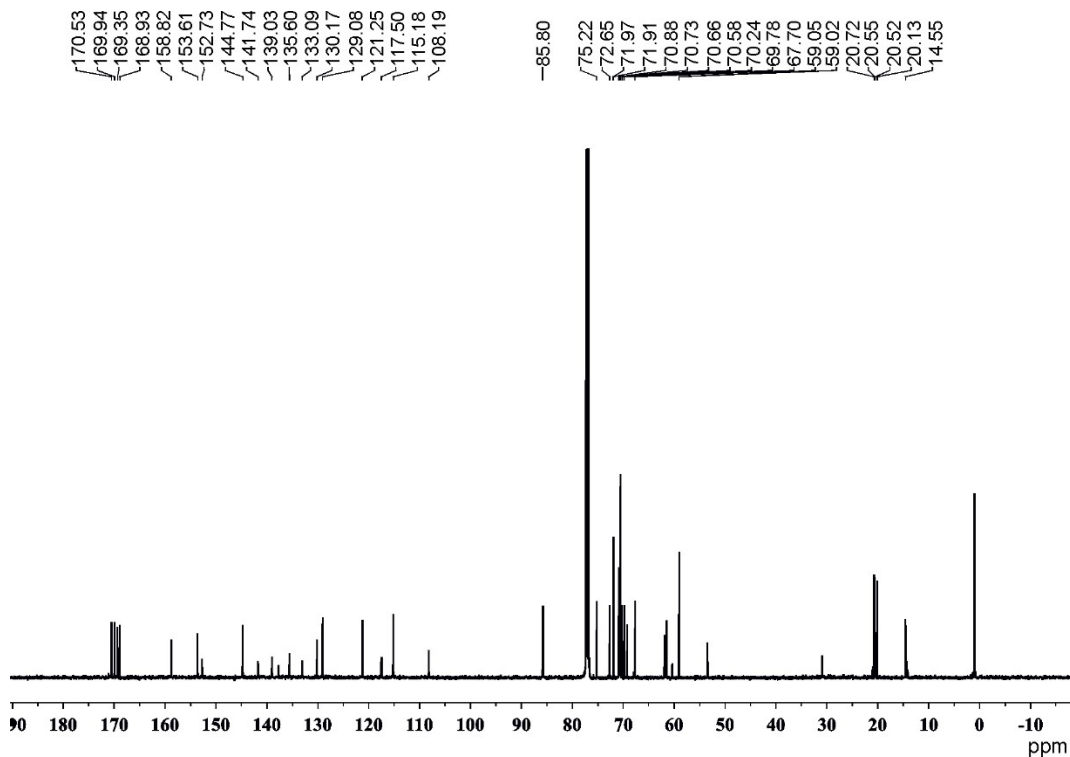

Fig. S40  $^{13}\text{C}$  NMR spectrum of compound **13** in  $\text{CDCl}_3$

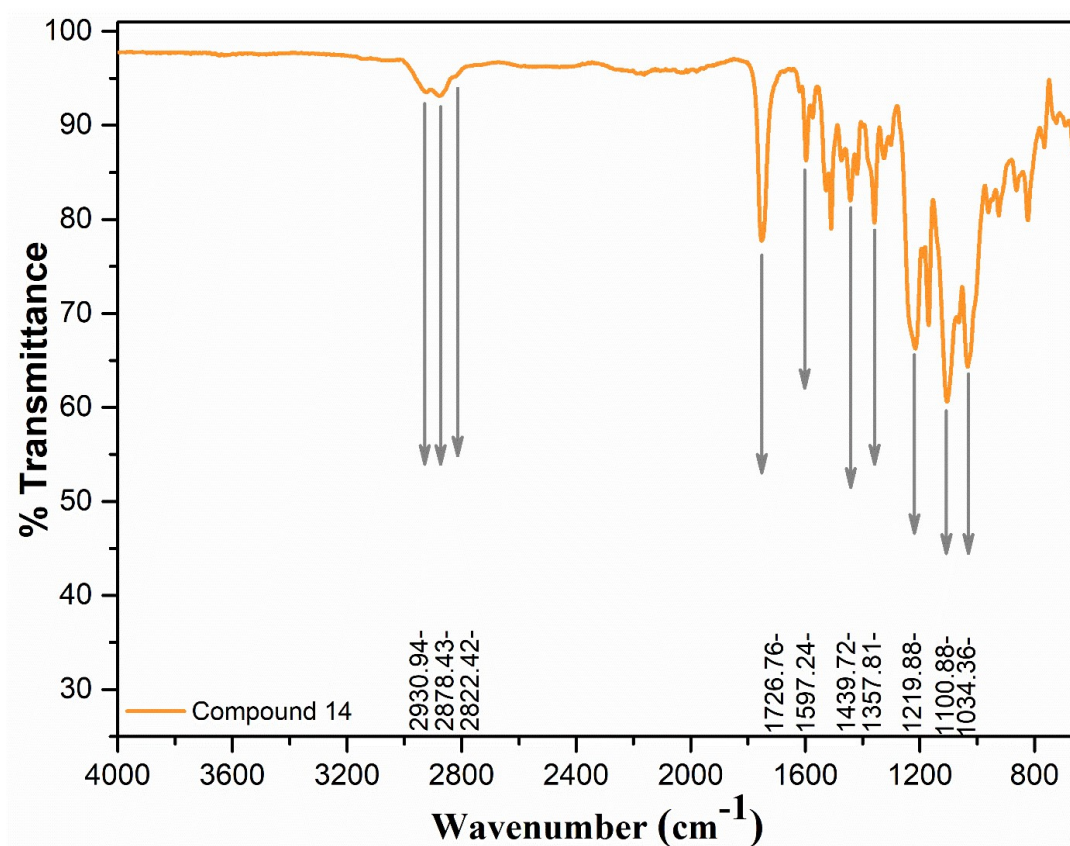

Fig. S41 FT-IR spectrum of compound **14**

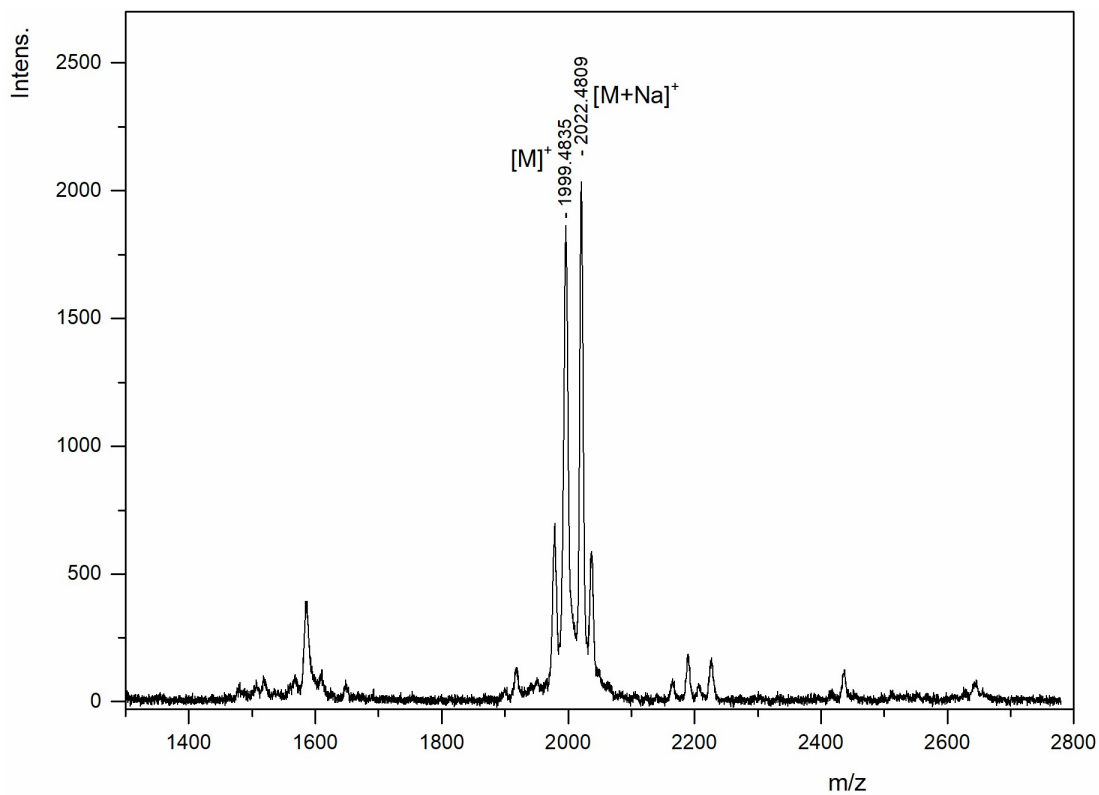

Fig. S42 MALDI-MS spectrum of compound 14

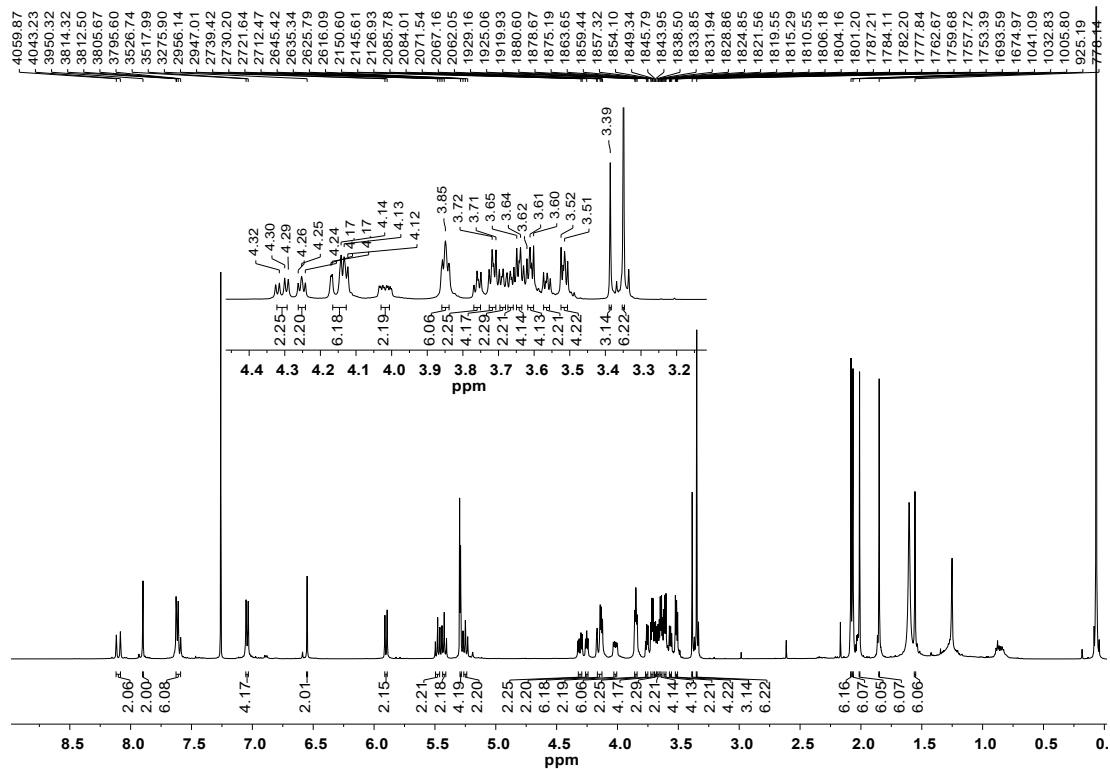

Fig. S43 <sup>1</sup>H NMR spectrum of compound 14 in CDCl<sub>3</sub>



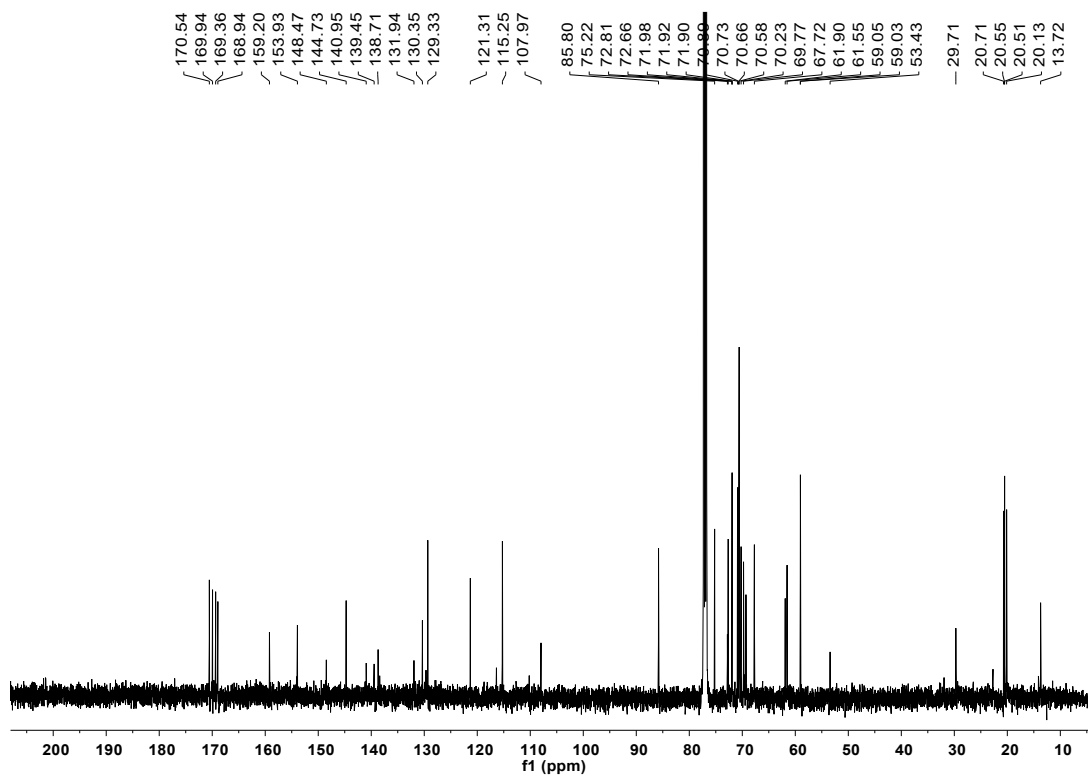

Fig. S44 <sup>13</sup>C NMR spectrum of compound 14 in CDCl<sub>3</sub>

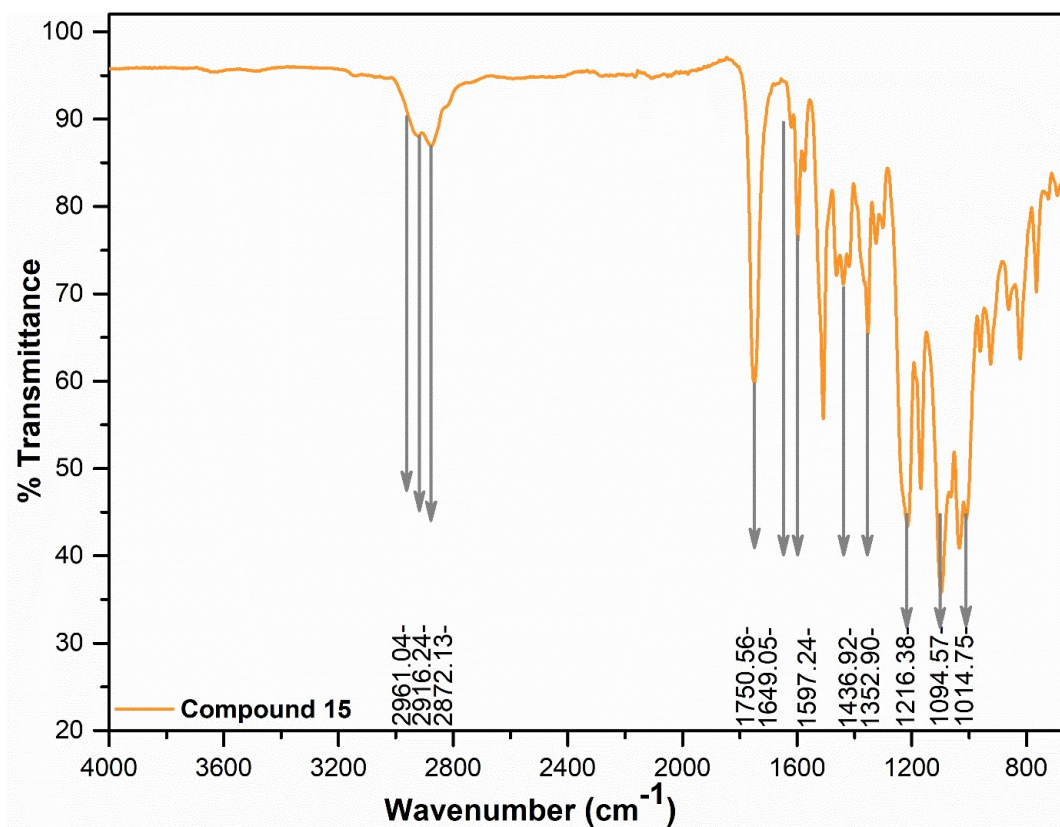

Fig. S45 FT-IR spectrum of compound 15

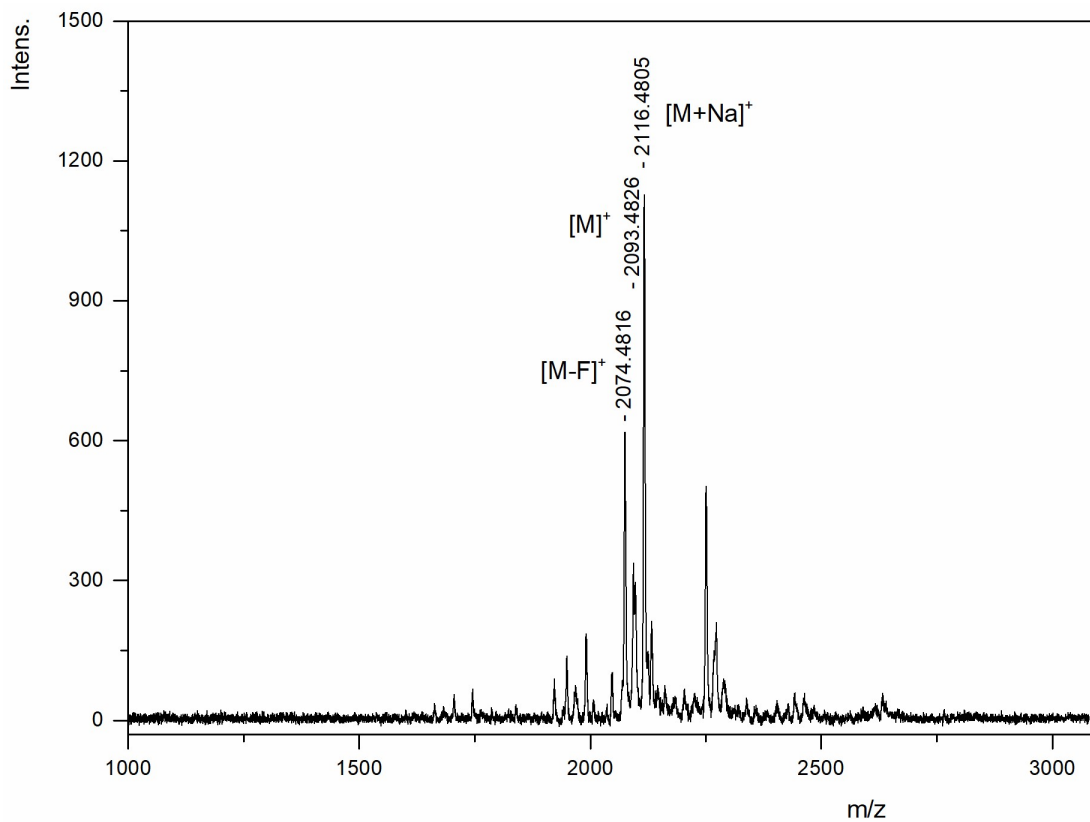

Fig. S46 MALDI-MS spectrum of compound 15

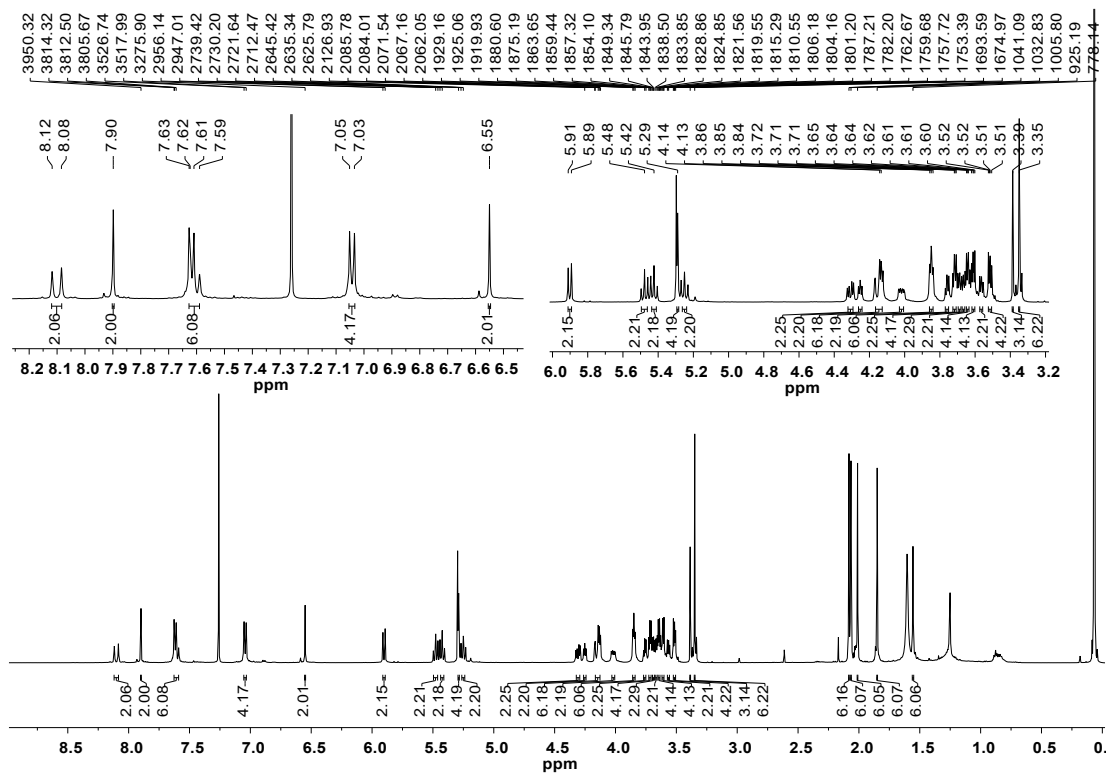

Fig. S47 <sup>1</sup>H NMR spectrum of compound 15 in CDCl<sub>3</sub>

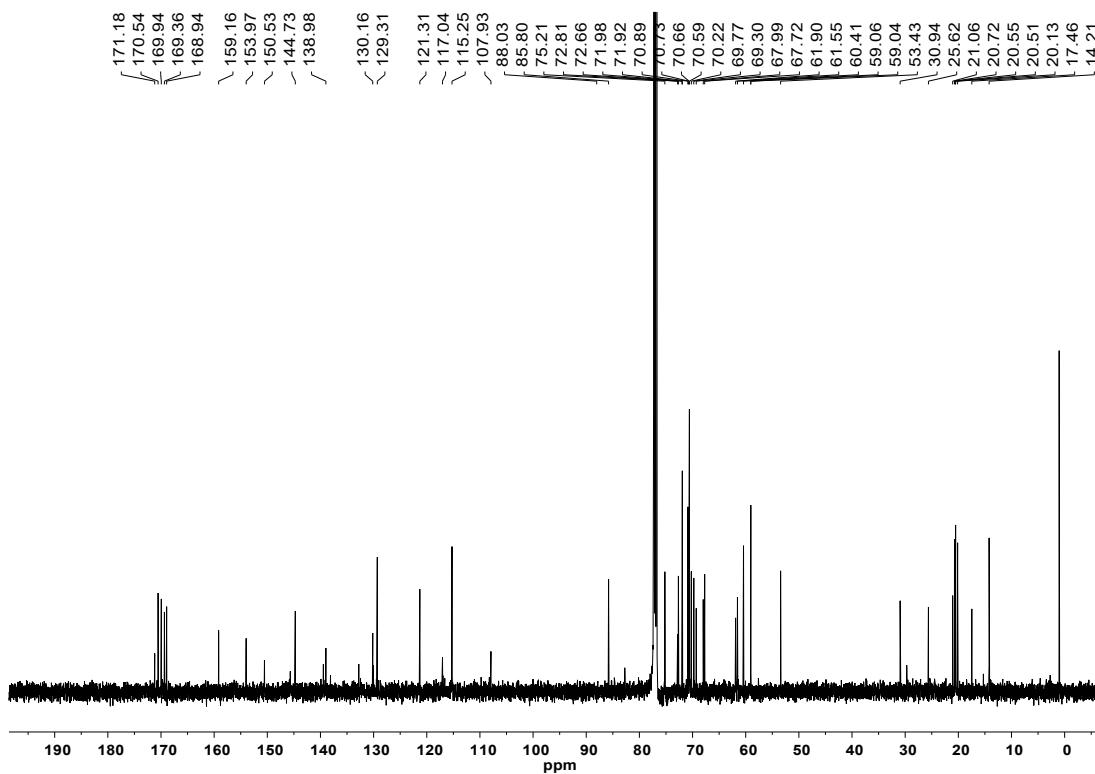

Fig. S48  $^{13}\text{C}$  NMR spectrum of compound 15 in  $\text{CDCl}_3$

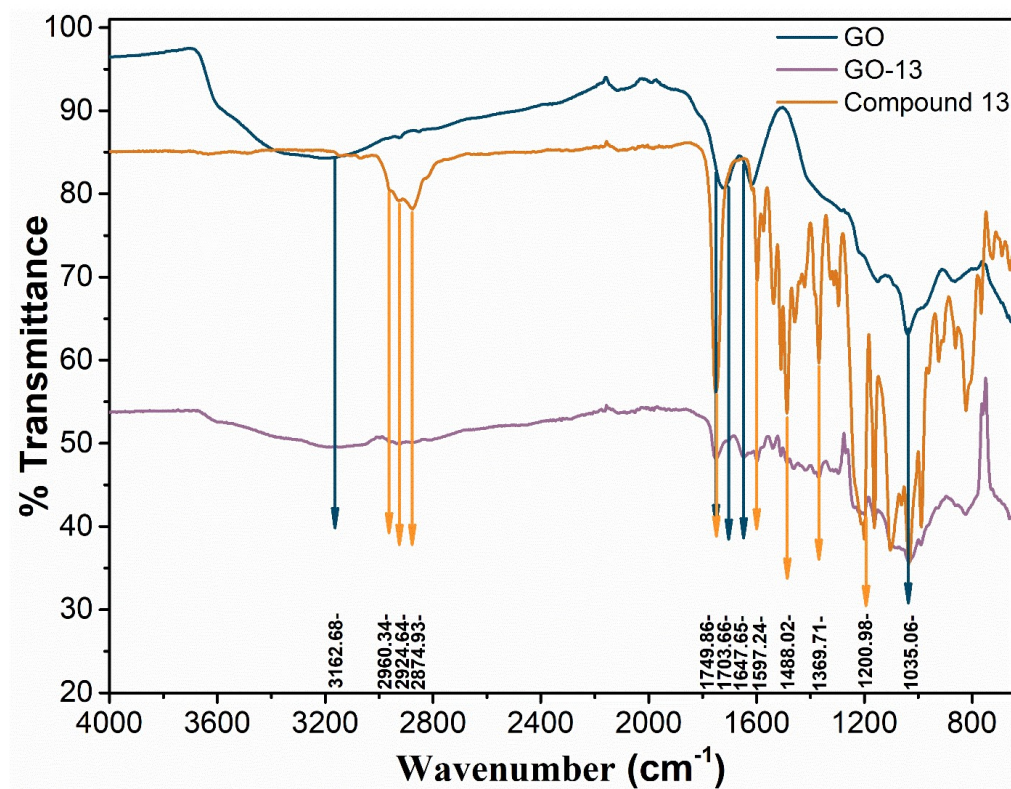

Fig. S49 FT-IR spectra of compound 13, GO and GO-13

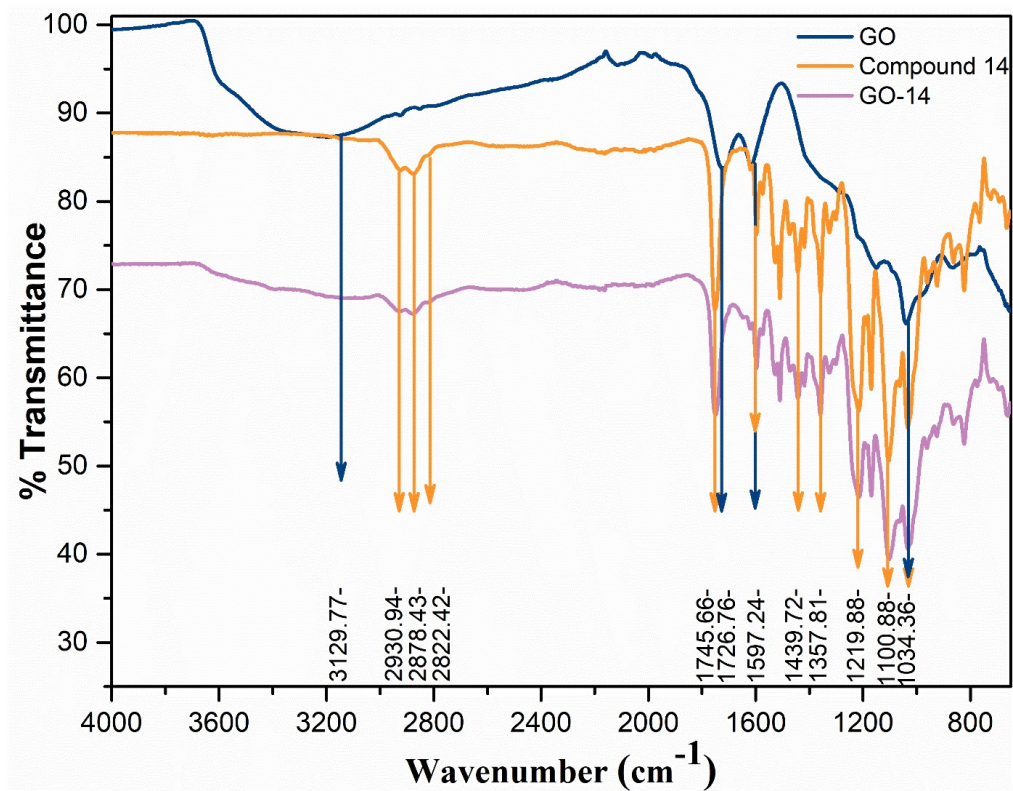

Fig. S50 FT-IR spectra of compound 14, GO and GO-14

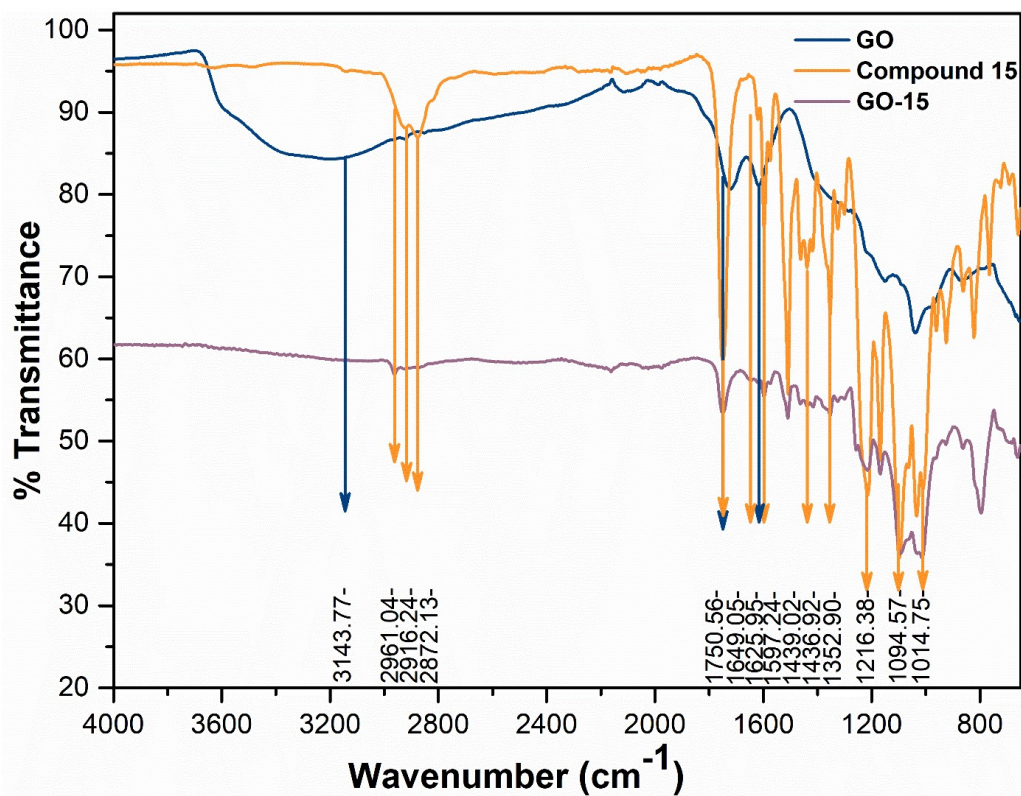

Fig. S51 FT-IR spectra of compound 15, GO and GO-15

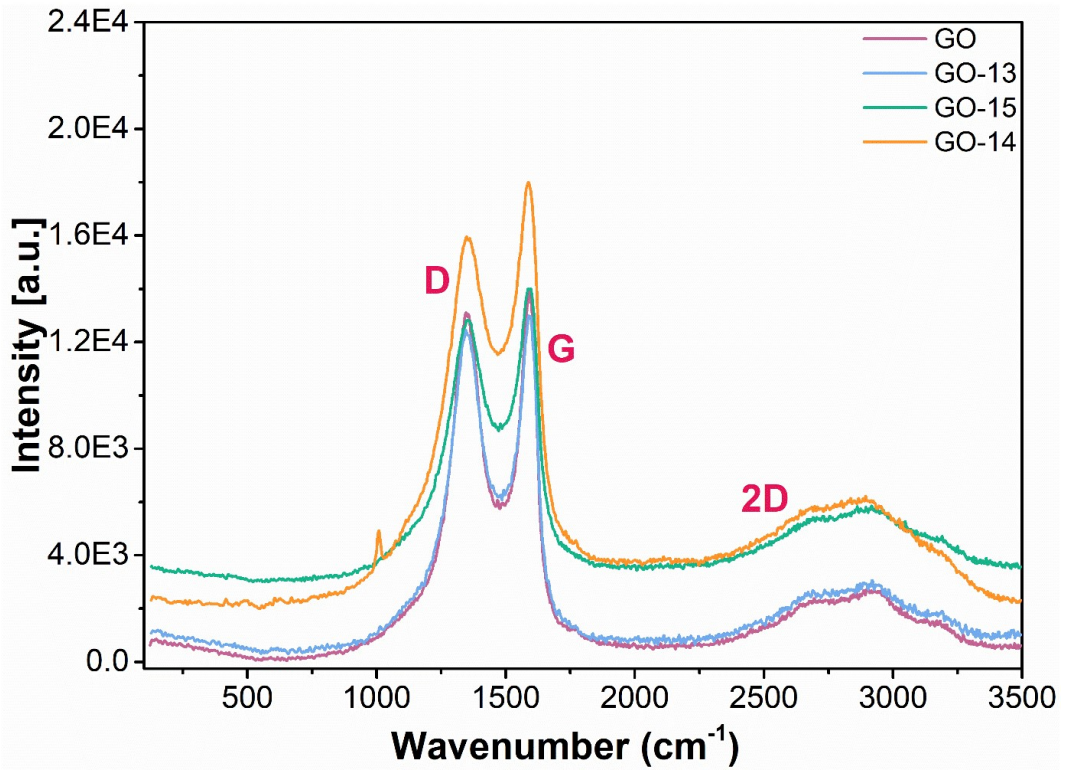

Fig. S52 Raman spectra of GO, GO-13, GO-14, and GO-15

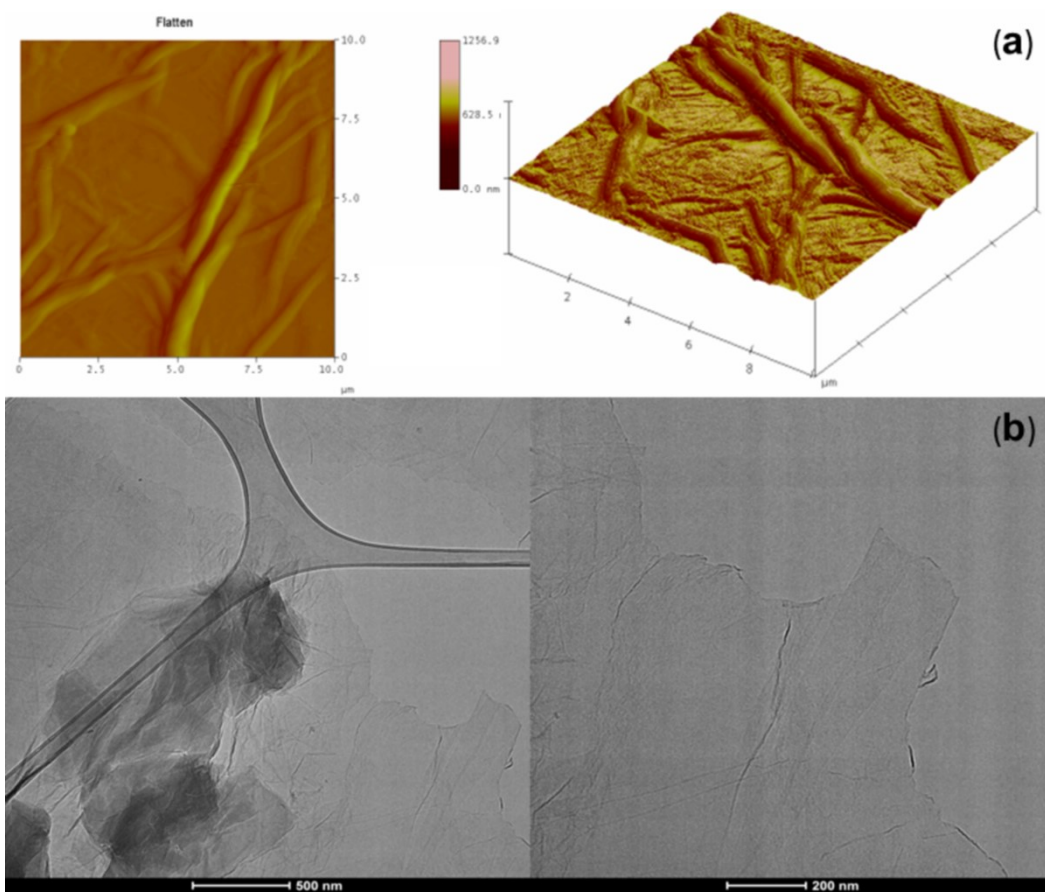

**Fig. S53 (a) AFM images and (b) TEM micrographs of GO**

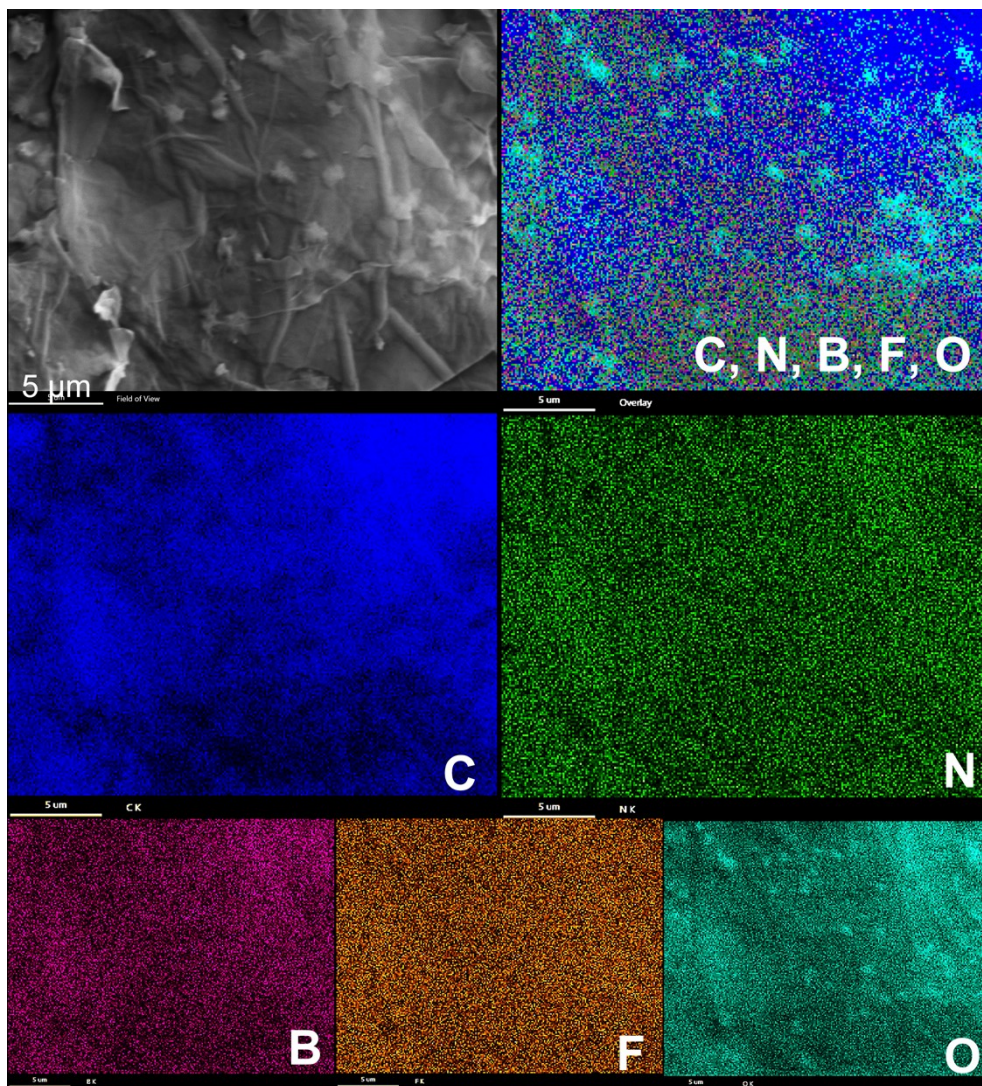

**Fig. S54** TEM-EDX analysis of **GO-13**

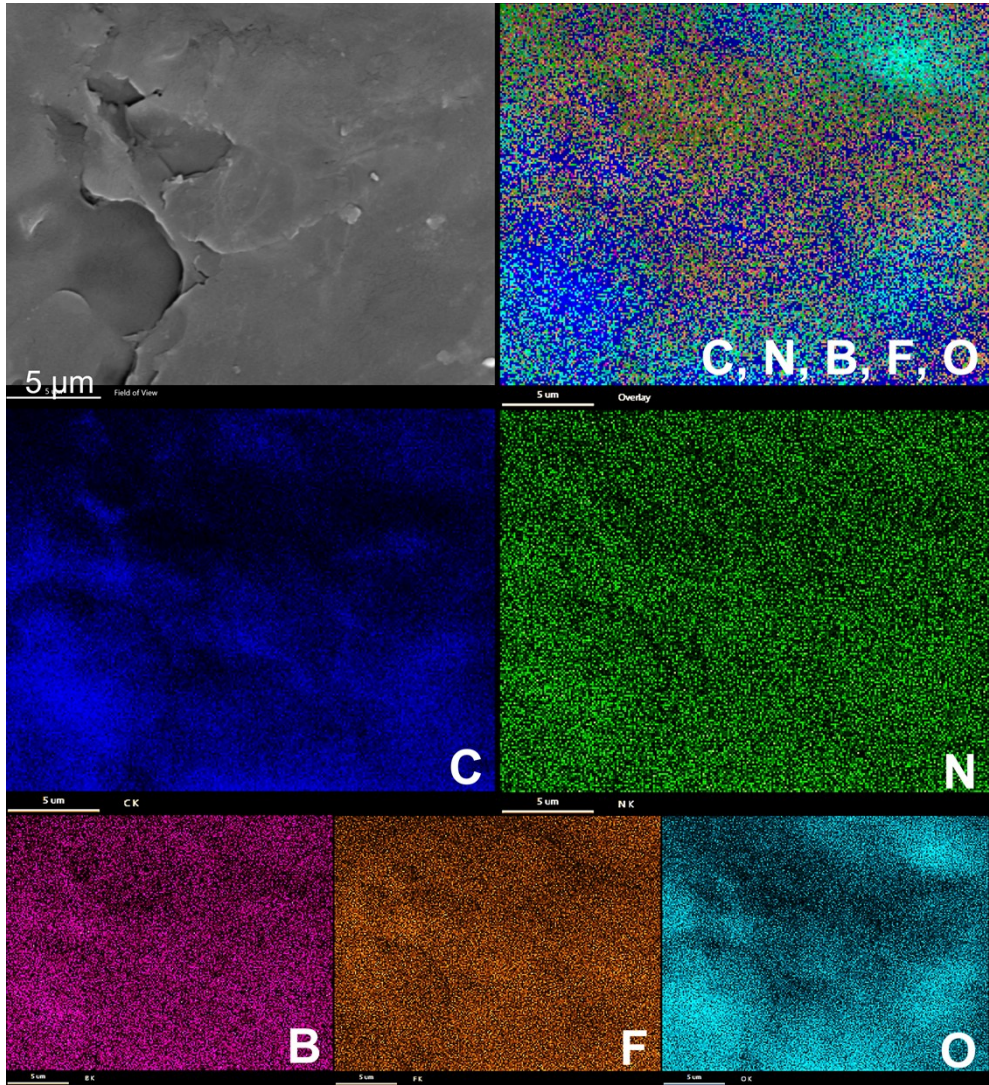

**Fig. S55** TEM-EDX analysis of **GO-14**



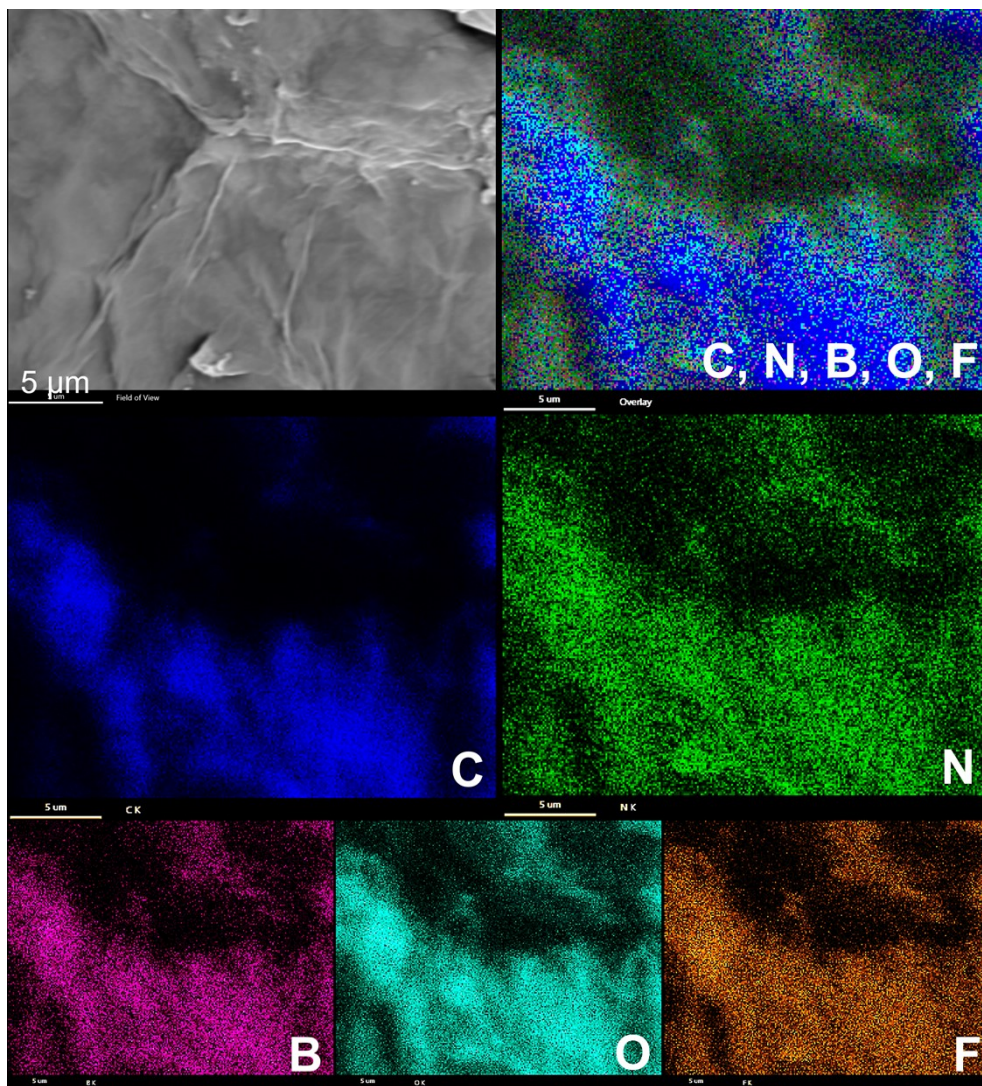

**Fig. S56** TEM-EDX analysis of **GO-15**

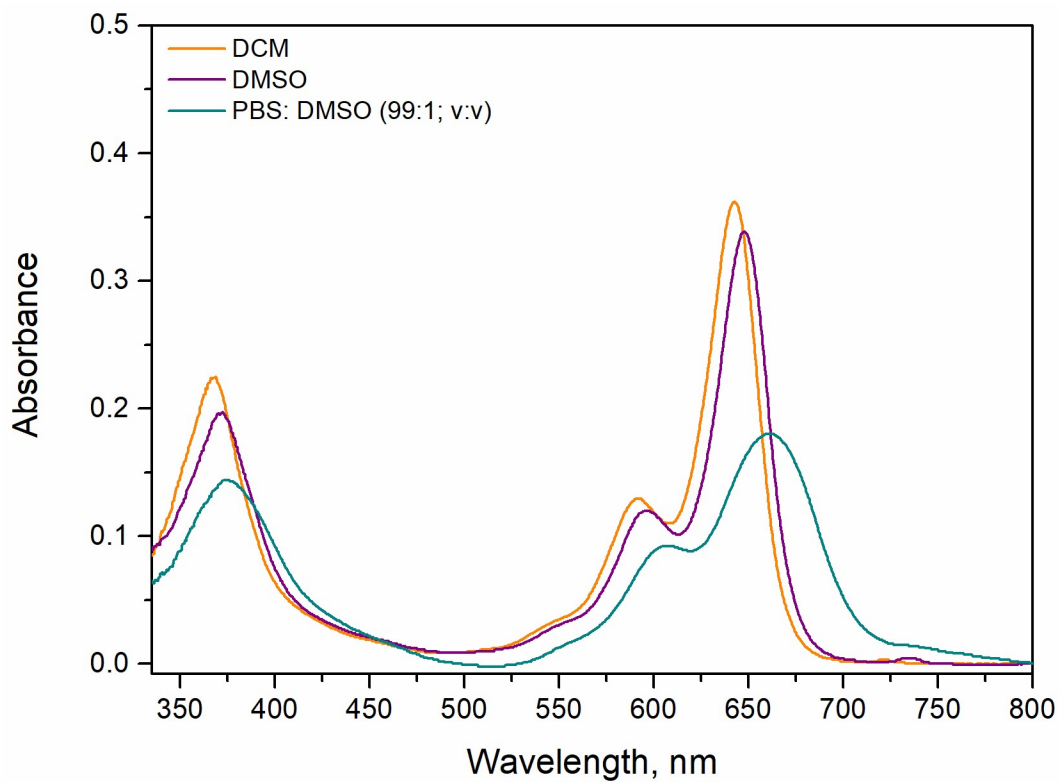

**Fig. S57** Absorbance spectra of compound **13** in different solvents (2 μM)

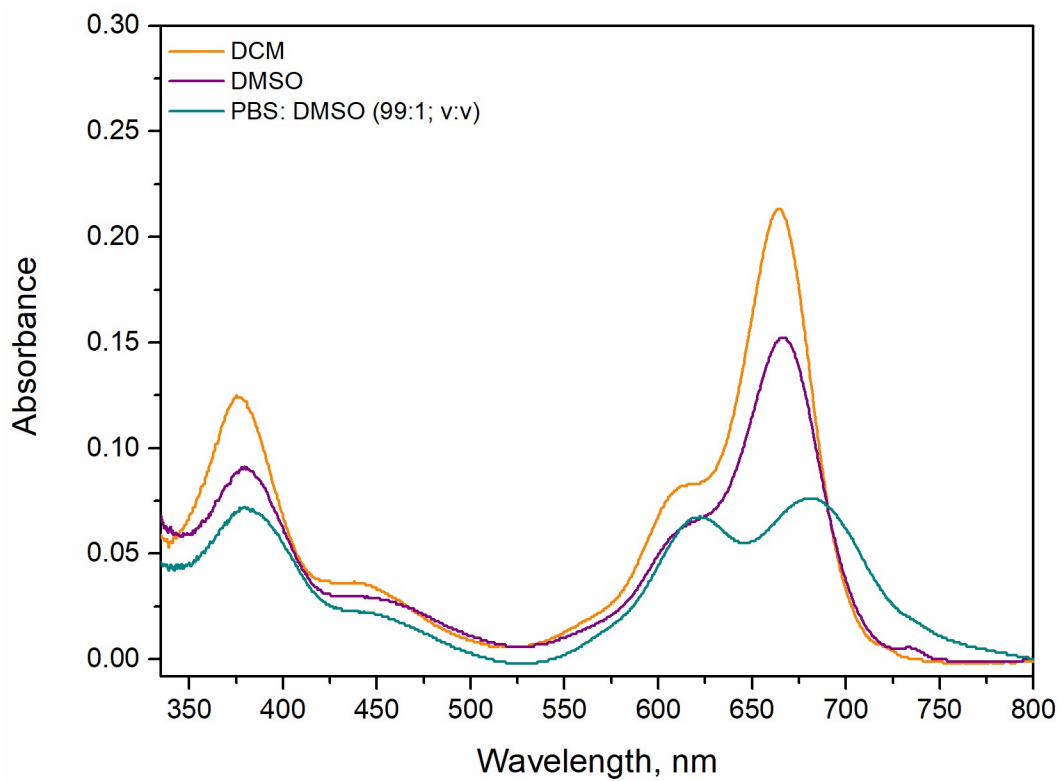

**Fig. S58** Absorbance spectra of compound **14** in different solvents (2 μM)

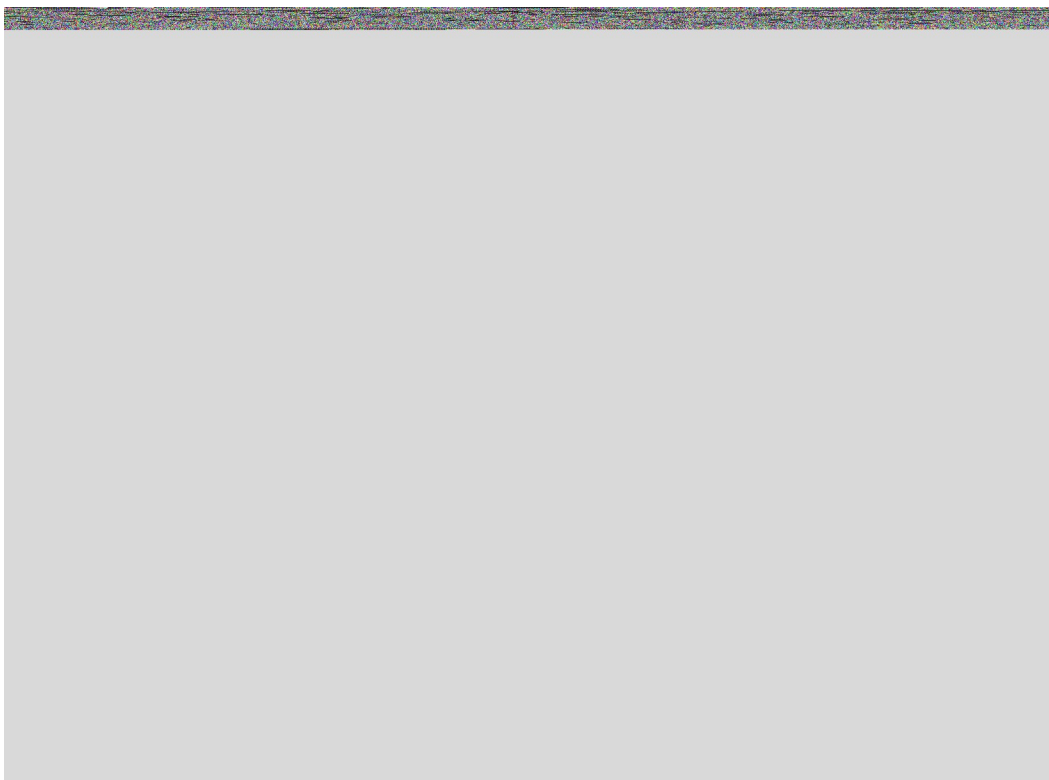

**Fig. S59** Absorbance spectra of compound **15** in different solvents (2  $\mu\text{M}$ )

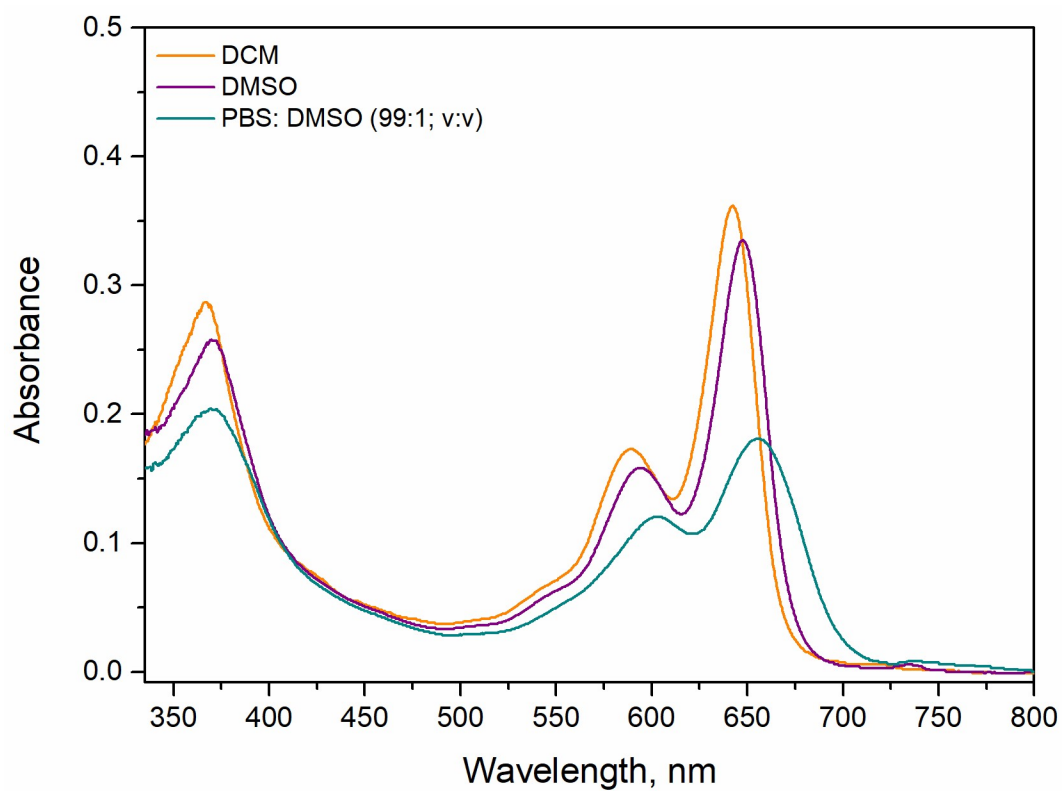

**Fig. S60** Absorbance spectra of **GO-13** in different solvents (2  $\mu\text{M}$ )

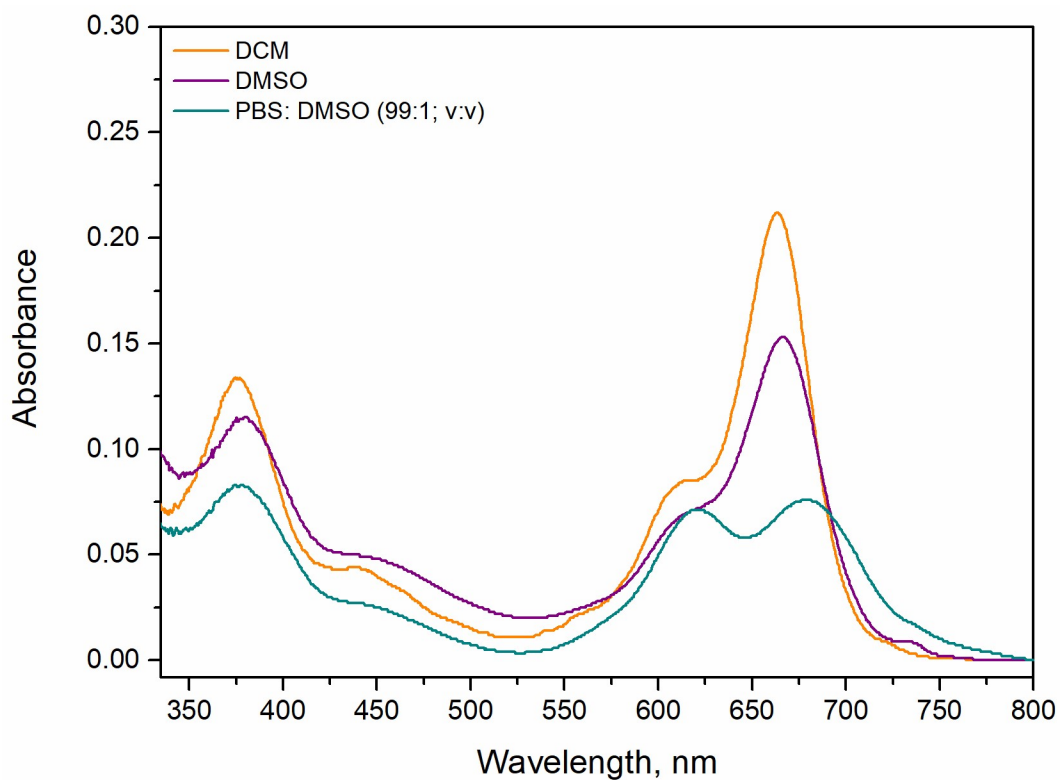

**Fig. S61** Absorbance spectra of **GO-14** in different solvents (2  $\mu\text{M}$ )



**Fig. S62** Absorbance spectra of **GO-15** in different solvents (2  $\mu\text{M}$ )

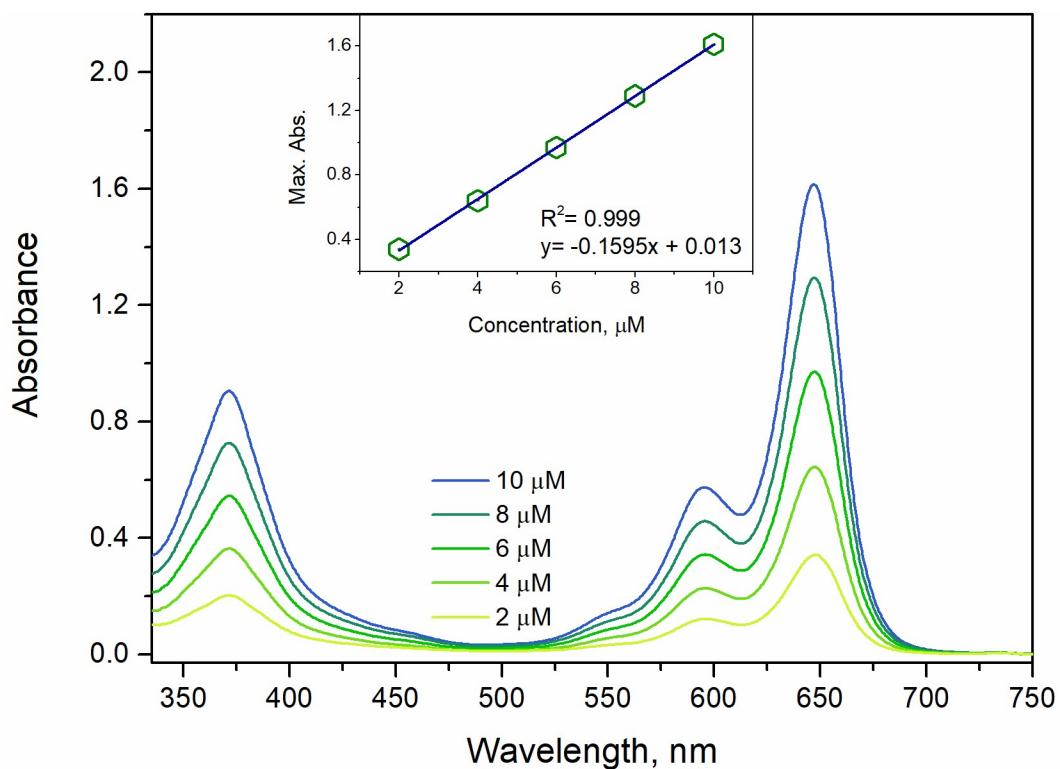

**Fig. S63** Absorption spectra of compound **13** in DMSO at different concentrations

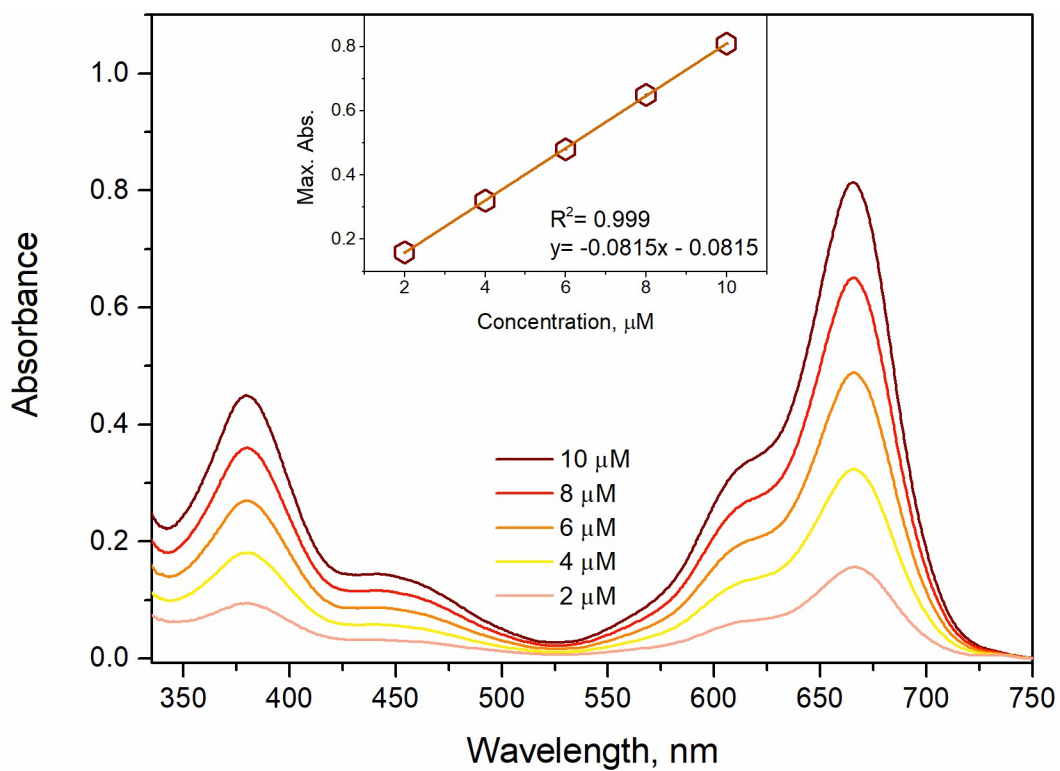

**Fig. S64** Absorption spectra of compound **14** in DMSO at different concentrations

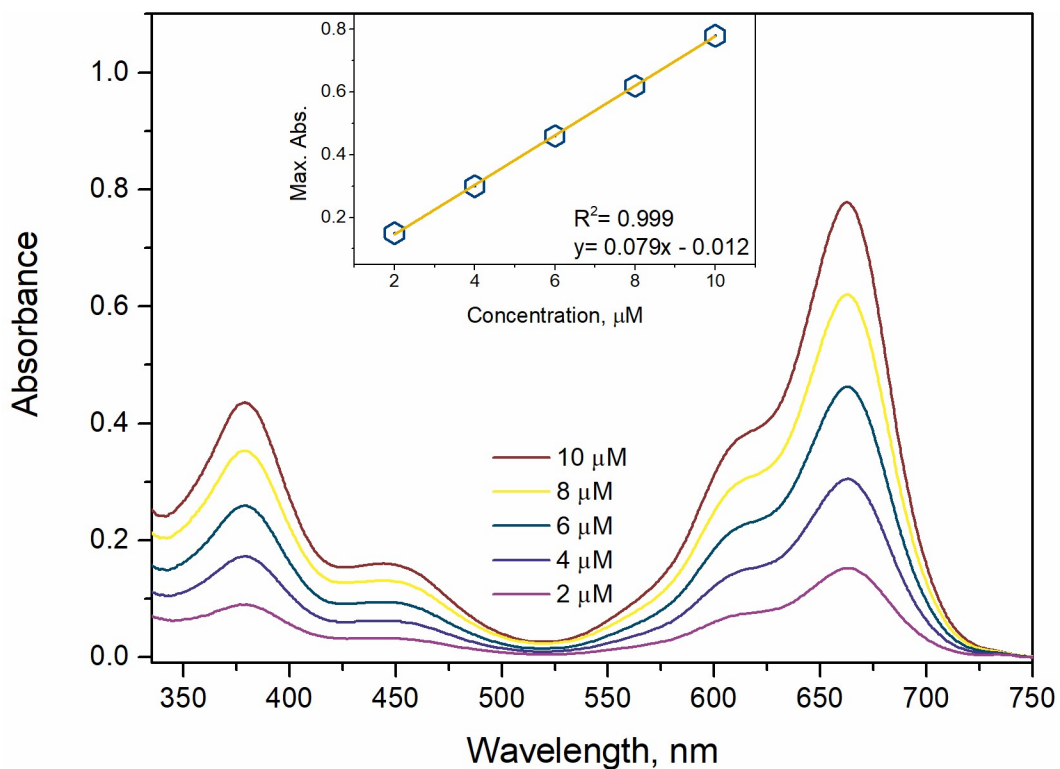

**Fig. S65** Absorption spectra of compound **15** in DMSO at different concentrations

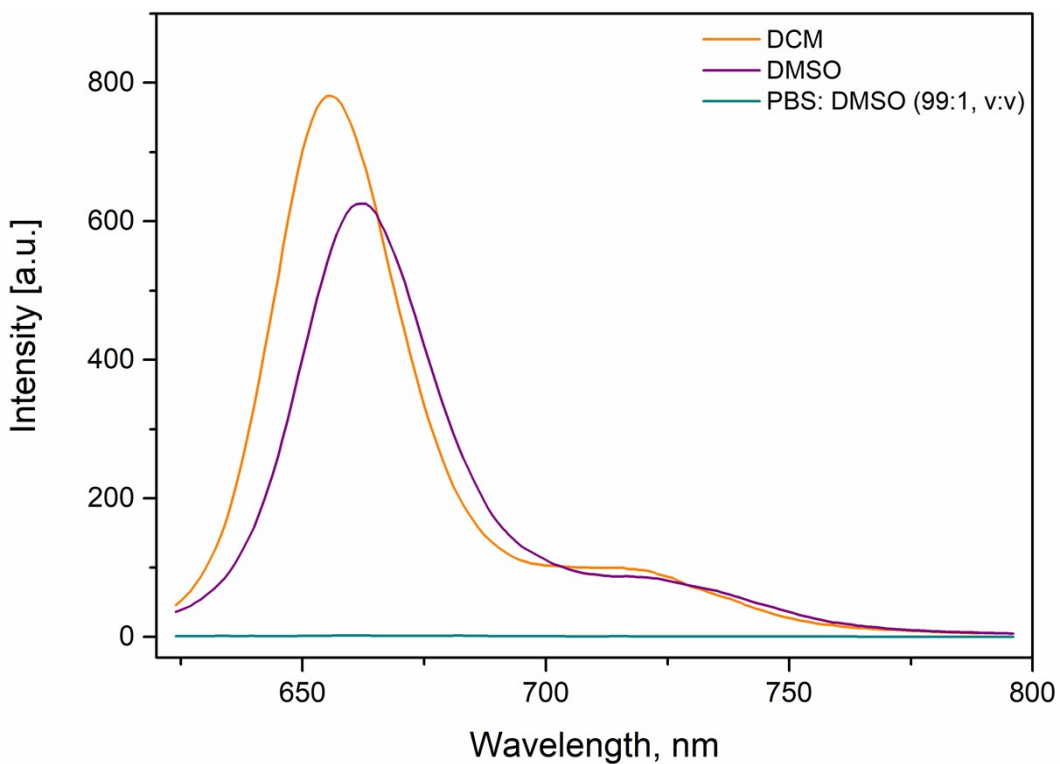

**Fig. S66** Fluorescence spectra of compound **13** ( $\lambda_{\text{ex}}$ :610 nm) in different solvents (0.5 μM)

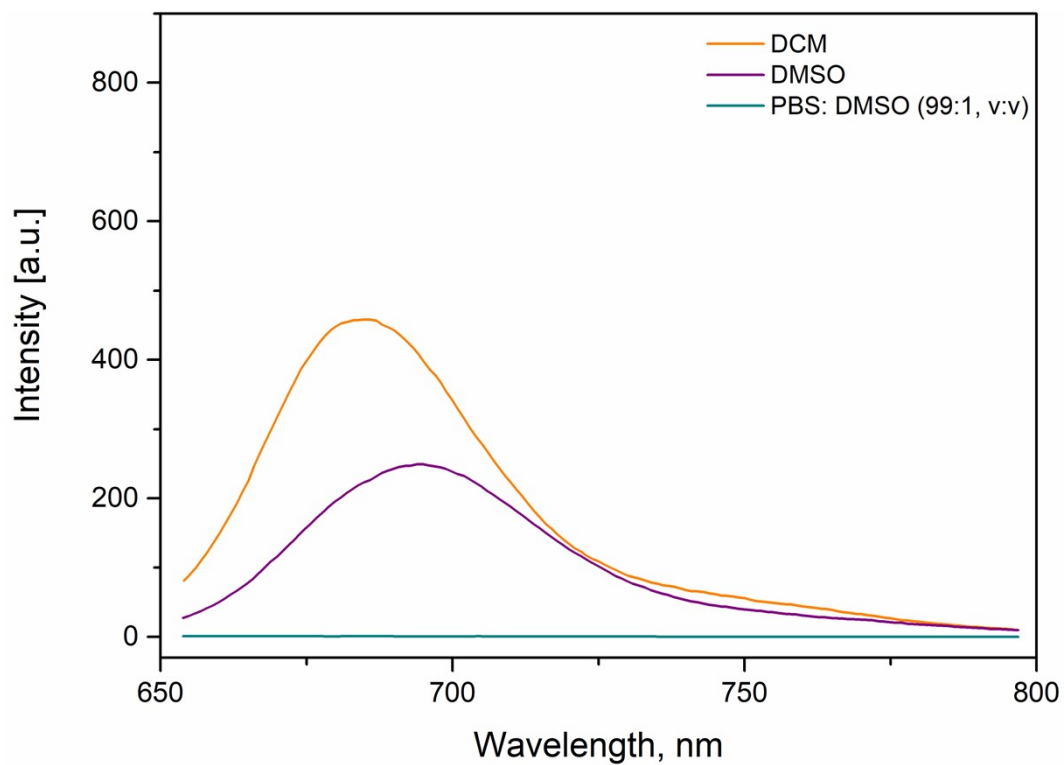

**Fig. S67** Fluorescence spectra of compound **14** ( $\lambda_{\text{ex}}$ :640 nm) in different solvents (0.5  $\mu\text{M}$ )

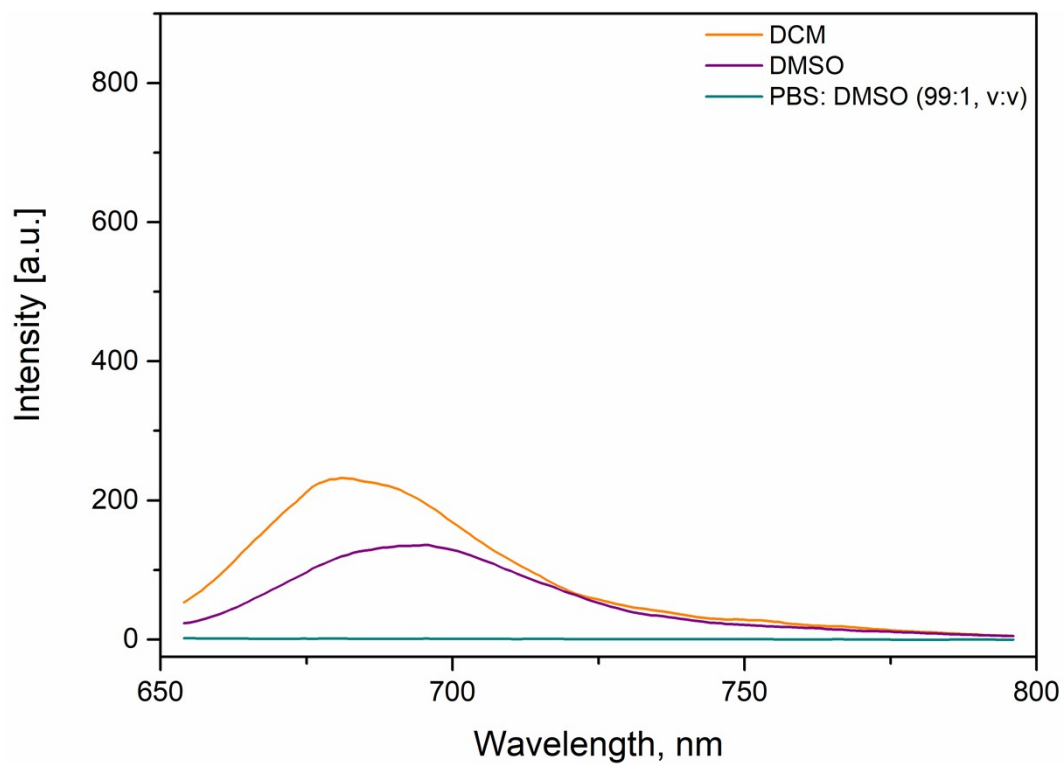

**Fig. S68** Fluorescence spectra of compound **15** ( $\lambda_{\text{ex}}$ :640 nm) in different solvents (0.5  $\mu\text{M}$ )

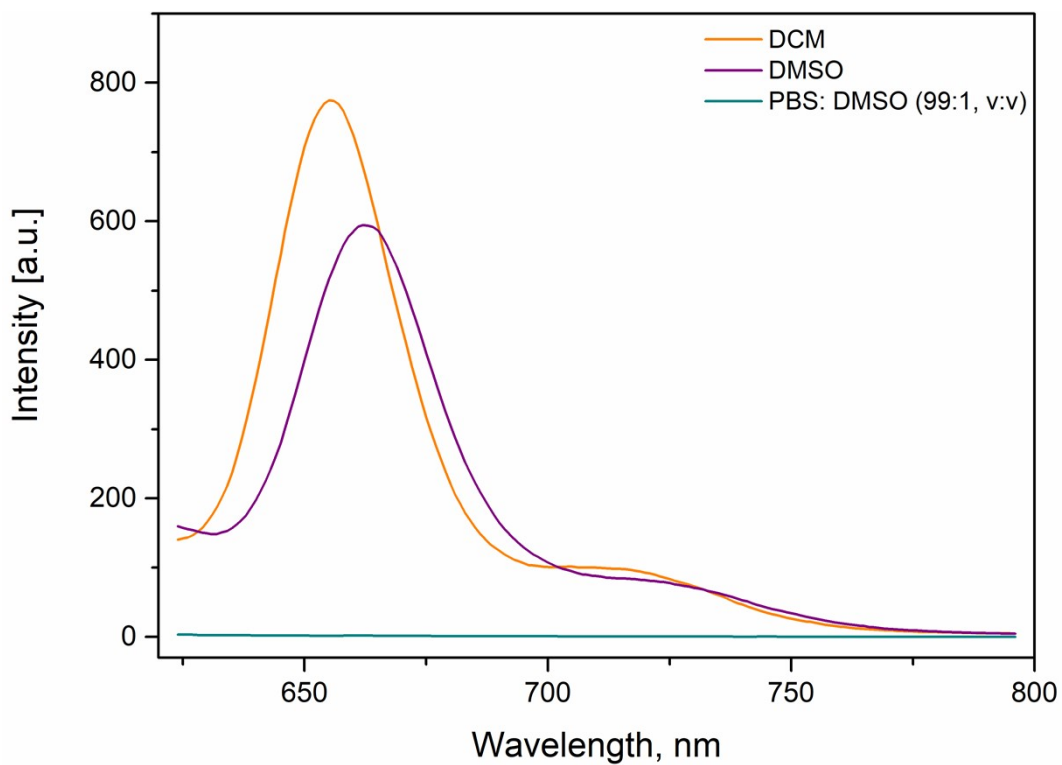

**Fig. S69** Fluorescence spectra of **GO-13** ( $\lambda_{\text{ex}}$ :610 nm) in different solvents (0.5  $\mu\text{M}$ )

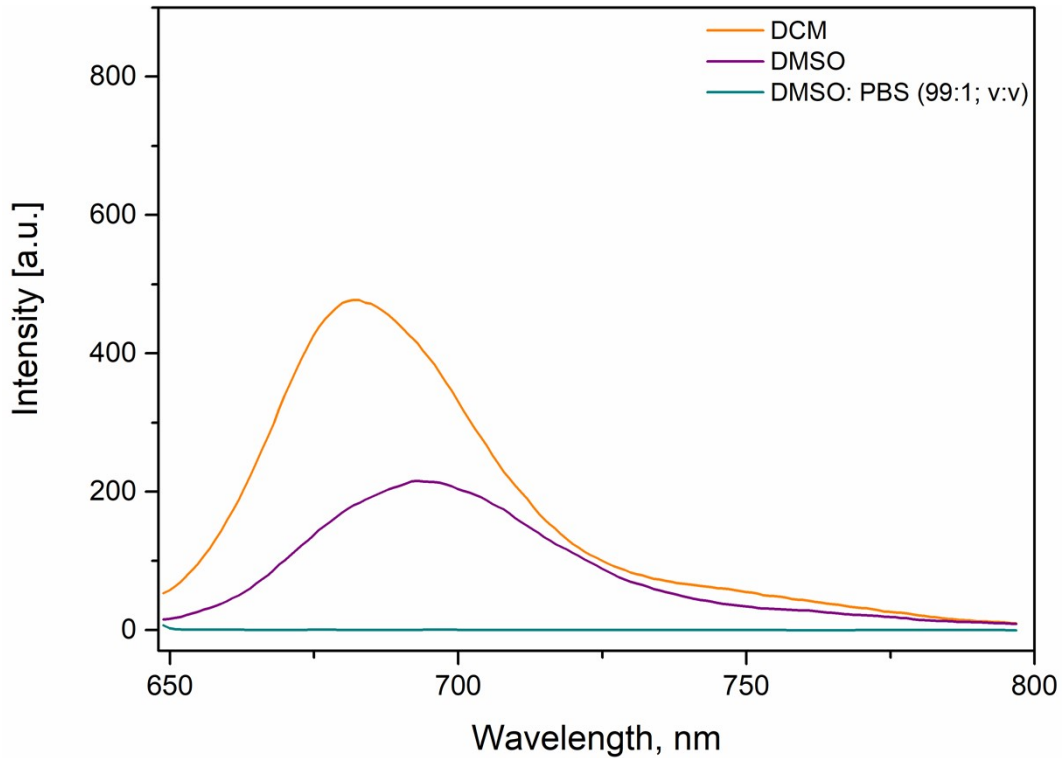

**Fig. S70** Fluorescence spectra of **GO-14** ( $\lambda_{\text{ex}}$ :640 nm) in different solvents (0.5  $\mu\text{M}$ )



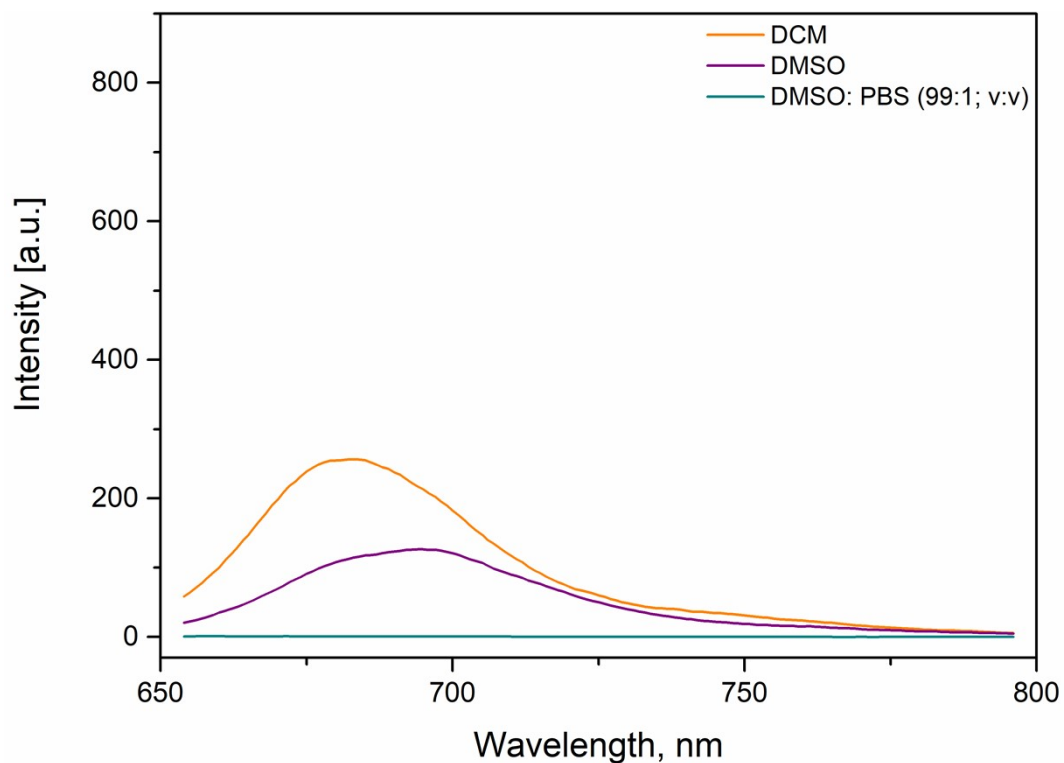

**Fig. S71** Fluorescence spectra of **GO-15** ( $\lambda_{\text{ex}}$ :640 nm) in different solvents (0.5  $\mu\text{M}$ )

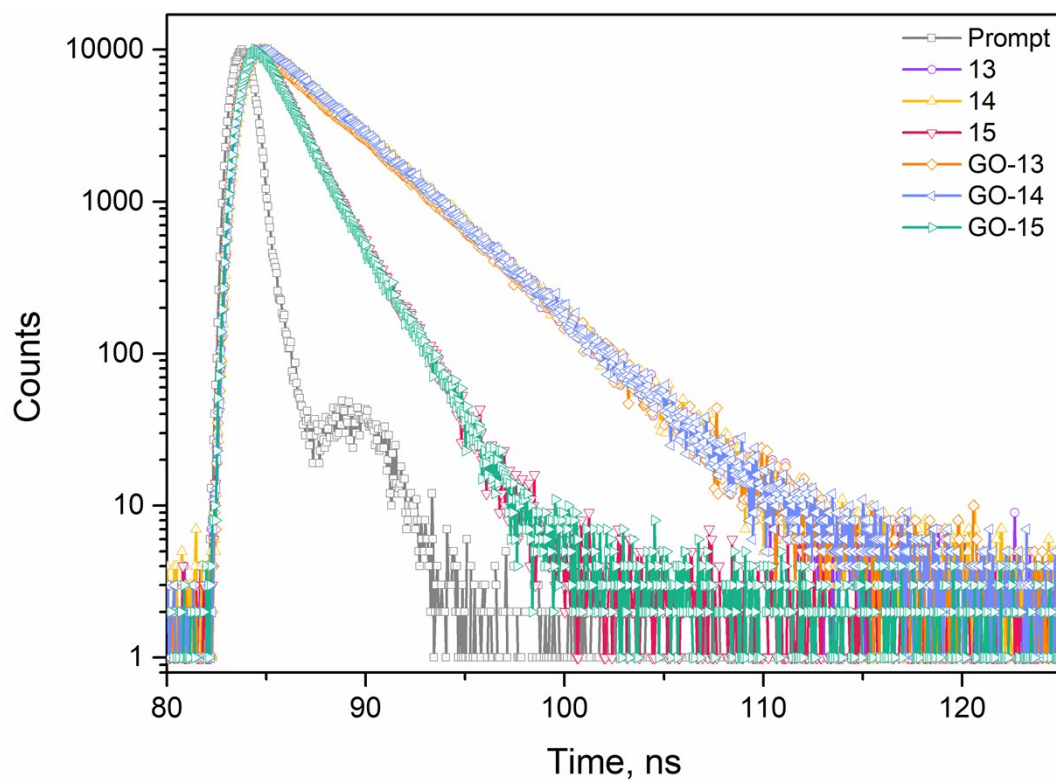

**Fig. S72** Fluorescence decay profiles of **13-15** and **GO-(13-15)** in DMSO

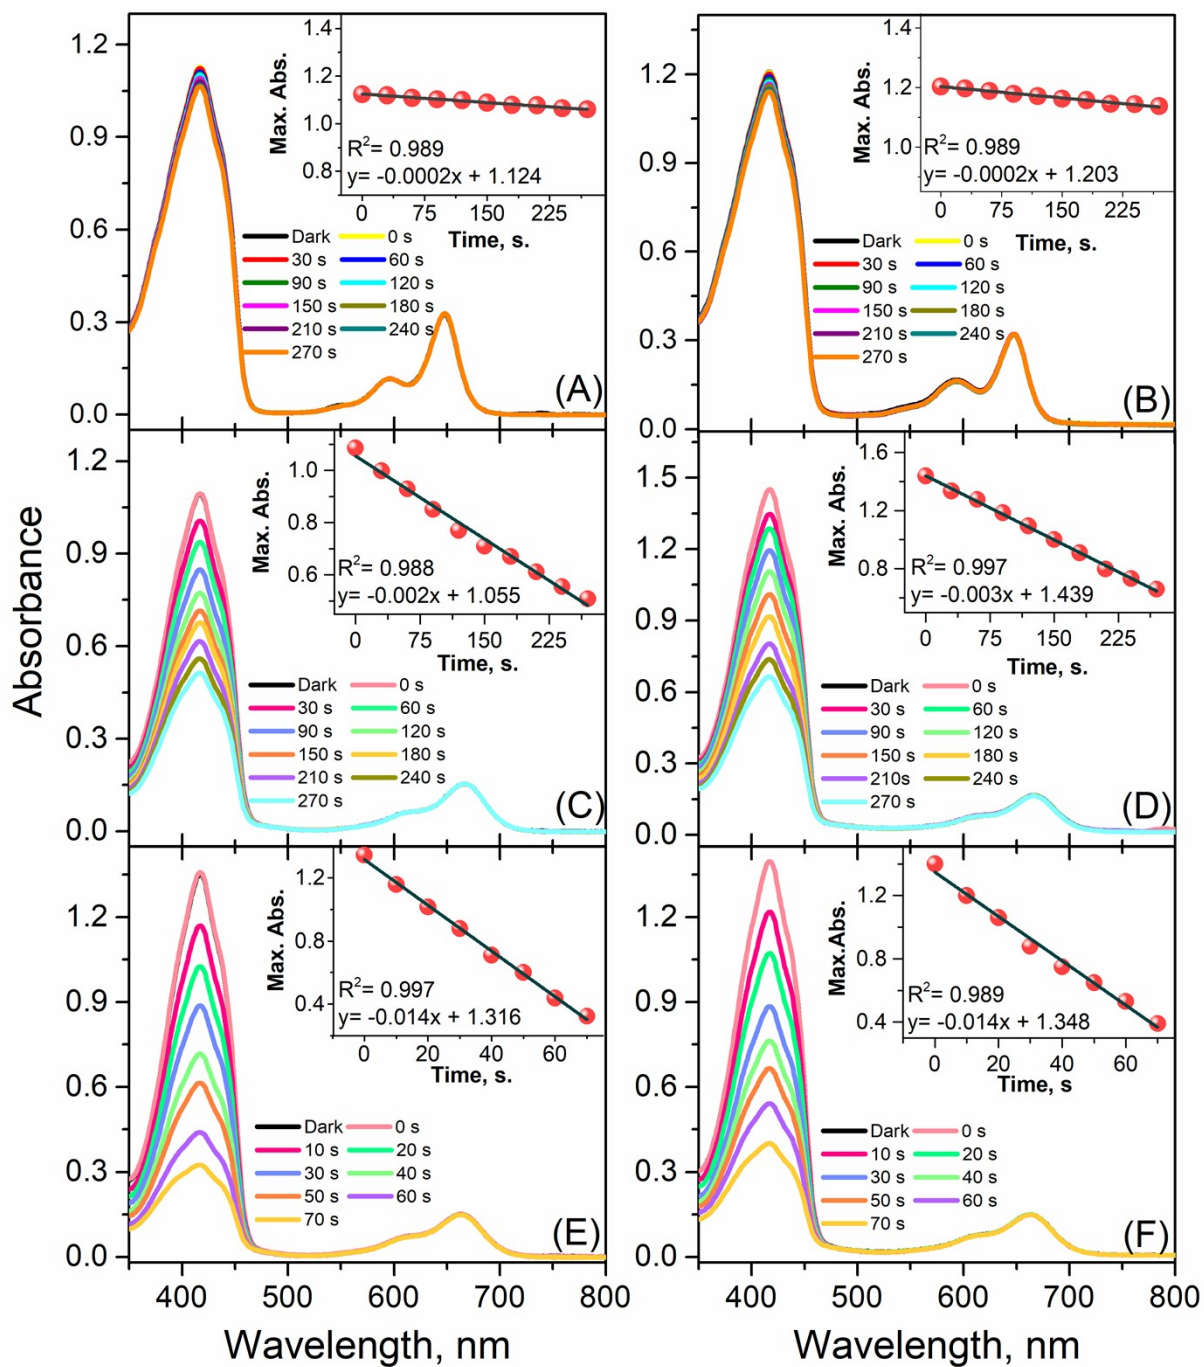

**Fig. S73.** Singlet oxygen generation of (A) 13, (B) GO-13, (C) 14, (D) GO-14, (E) 15, (F) GO-15 in DMSO (2  $\mu$ M).

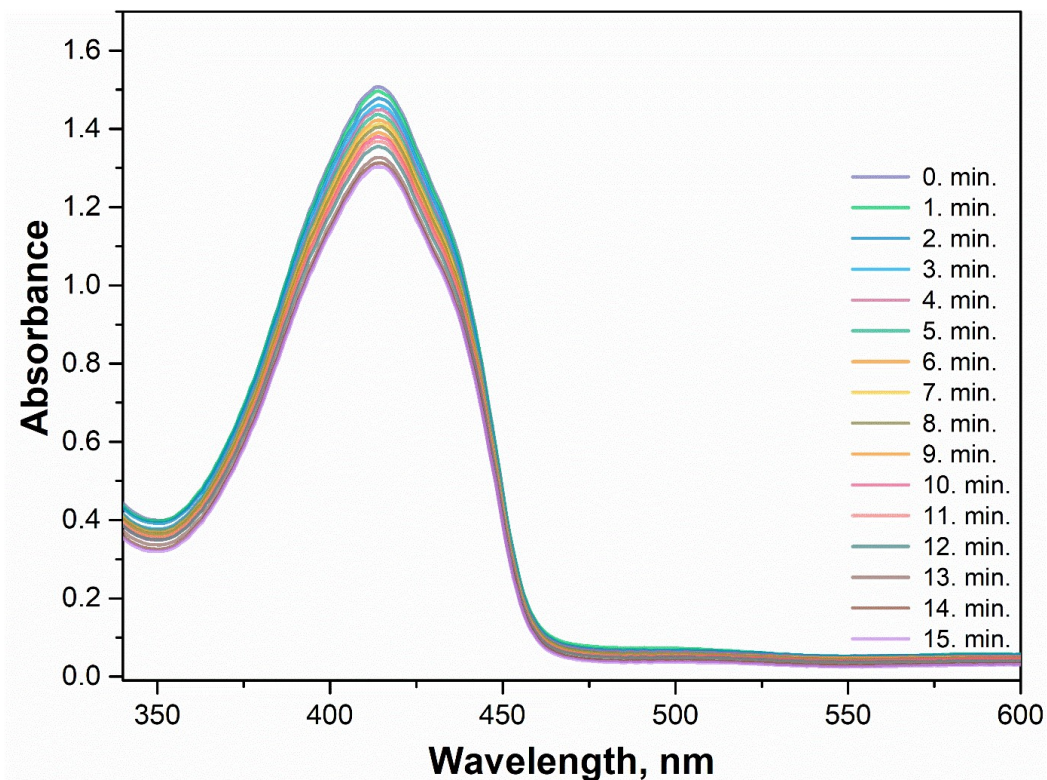

**Fig. S74.** Decrease in absorbance spectra of DPBF in the presence of GO in DMSO

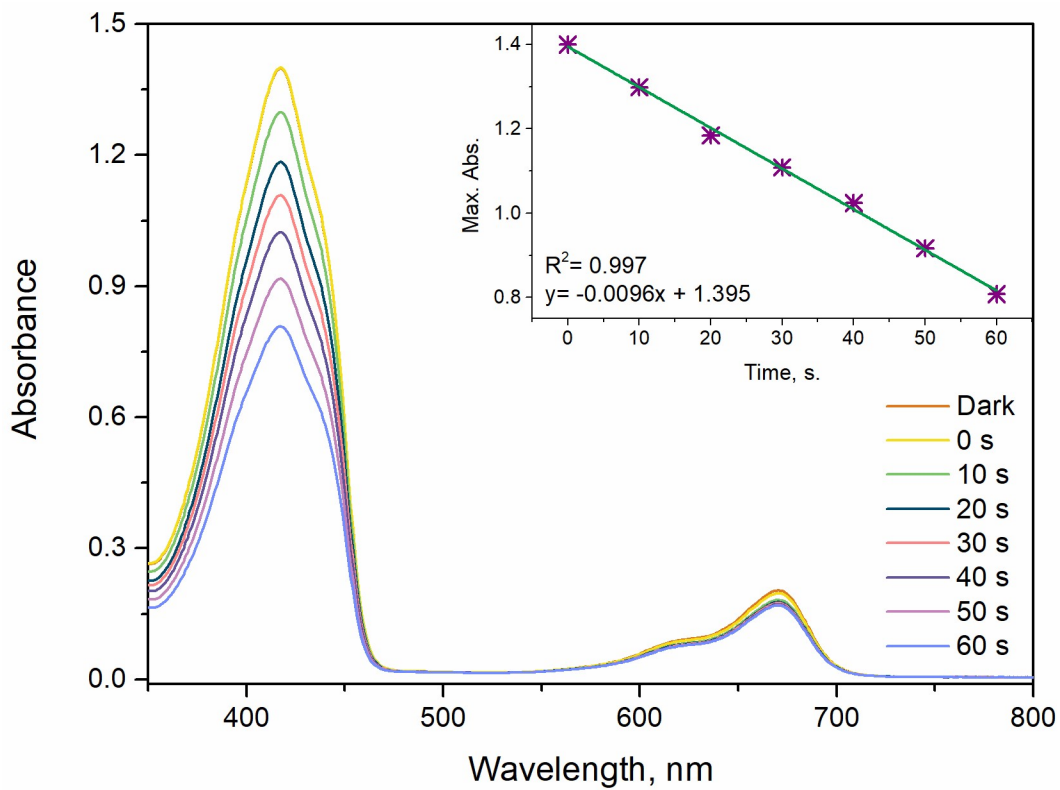

**Fig. S75.** Decrease in absorbance spectra of DPBF in the presence of MB in DMSO
